# Supplementary material for: Synthesis and catalytic activity of N-heterocyclic silylene (NHSi) cobalt hydride for Kumada coupling reactions
Source: Royal Society of Chemistry journal article supplement (doi:10.1039/c7dt04155a), 2018-01-01
Supplement: c7dt04155a1.pdf [file c7dt04155a1.pdf]

## Synthesis and Catalytic Activity of N-Heterocyclic Silylene (NHSi) Cobalt Hydride for Kumada Coupling Reactions

Xinghao Qi,<sup>a</sup> Hongjian Sun,<sup>a,\*</sup> Xiaoyan Li,<sup>a,\*</sup> Olaf Fuhr,<sup>b</sup> Dieter Fenske<sup>b</sup>

<sup>a</sup> School of Chemistry and Chemical Engineering, Key Laboratory of Special Functional Aggregated Materials, Ministry of Education, Shandong University, Shanda Nanlu 27, 250199 Jinan, People's Republic of China

<sup>b</sup> Institut für Nanotechnologie (INT) und Karlsruher Nano-Micro-Facility (KNMF), Karlsruher Institut für Technologie (KIT), Hermann-von-Helmholtz-Platz 1, 76344 Eggenstein-Leopoldshafen, Germany

|                                                                                                                                                                          |    |
|--------------------------------------------------------------------------------------------------------------------------------------------------------------------------|----|
| <b>SI</b> The table of selected crystallographic data                                                                                                                    | 2  |
| <b>SII</b> IR, <sup>1</sup> H, <sup>31</sup> P, <sup>13</sup> C NMR, HH COSY, HMQC, HSQC and <sup>29</sup> Si NMR spectra of complexes <b>5</b> , <b>6</b> and <b>6d</b> | 3  |
| <b>SIII</b> <sup>1</sup> H and <sup>13</sup> C NMR spectra of coupling products                                                                                          | 12 |
| <b>SIV</b> MS of study on the catalytic reaction mechanism                                                                                                               | 27 |

**SI The table of selected crystallographic data**

|                                       | <b>5</b>                                                                                        | <b>6</b>                                                                                                         | <b>6d</b>                                                                                        |
|---------------------------------------|-------------------------------------------------------------------------------------------------|------------------------------------------------------------------------------------------------------------------|--------------------------------------------------------------------------------------------------|
| formula                               | C <sub>41</sub> H <sub>76</sub> Cl <sub>3</sub> CoN <sub>4</sub> P <sub>2</sub> Si <sub>2</sub> | C <sub>106</sub> H <sub>138</sub> Cl <sub>4</sub> Co <sub>2</sub> N <sub>8</sub> OP <sub>6</sub> Si <sub>4</sub> | C <sub>55</sub> H <sub>73</sub> Cl <sub>2</sub> CoN <sub>4</sub> OP <sub>3</sub> Si <sub>2</sub> |
| $M_z$                                 | 908.45                                                                                          | 2098.08                                                                                                          | 1085.09                                                                                          |
| crystal system                        | Monoclinic                                                                                      | Triclinic                                                                                                        | Triclinic                                                                                        |
| space group                           | P2 <sub>1</sub> /c                                                                              | P-1                                                                                                              | P-1                                                                                              |
| $a$ [Å]                               | 13.8468(3)                                                                                      | 13.9433(5)                                                                                                       | 13.9845(14)                                                                                      |
| $b$ [Å]                               | 19.5827(5)                                                                                      | 17.2555(7)                                                                                                       | 17.415(2)                                                                                        |
| $c$ [Å]                               | 18.5459(4)                                                                                      | 24.5173(10)                                                                                                      | 24.858(3)                                                                                        |
| $\alpha$ [°]                          | 90                                                                                              | 99.180(3)                                                                                                        | 98.767(9)                                                                                        |
| $\beta$ [°]                           | 103.406(2)                                                                                      | 99.723(3)                                                                                                        | 101.053(8)                                                                                       |
| $\gamma$ [°]                          | 90                                                                                              | 103.830(3)                                                                                                       | 103.860(8)                                                                                       |
| $V$ [Å <sup>3</sup> ]                 | 4891.8(2)                                                                                       | 5521.0(4)                                                                                                        | 5642.2(11)                                                                                       |
| T [K]                                 | 150.15                                                                                          | 150.15                                                                                                           | 173.15                                                                                           |
| Z                                     | 4                                                                                               | 2                                                                                                                | 4                                                                                                |
| $\mu$ [mm <sup>-1</sup> ]             | 5.581                                                                                           | 4.862                                                                                                            | 0.568                                                                                            |
| total reflns                          | 22857                                                                                           | 49093                                                                                                            | 56456                                                                                            |
| unique reflns                         | 7980                                                                                            | 17989                                                                                                            | 30063                                                                                            |
| R <sub>int</sub>                      | 0.0674                                                                                          | 0.1348                                                                                                           | 0.0696                                                                                           |
| R <sub>1</sub> [I>2 $\sigma$ (I)]     | 0.0466                                                                                          | 0.0949                                                                                                           | 0.0838                                                                                           |
| wR(F <sup>2</sup> )[I>2 $\sigma$ (I)] | 0.0988                                                                                          | 0.2452                                                                                                           | 0.2208                                                                                           |
| R <sub>1</sub> (all data)             | 0.0827                                                                                          | 0.1749                                                                                                           | 0.1409                                                                                           |
| wR(F <sup>2</sup> )(all data)         | 0.1097                                                                                          | 0.3026                                                                                                           | 0.2695                                                                                           |
| GOF on F <sup>2</sup>                 | 0.875                                                                                           | 0.847                                                                                                            | 0.951                                                                                            |

**S II IR, <sup>1</sup>H, <sup>31</sup>P and <sup>13</sup>C NMR and <sup>29</sup>Si NMR spectra of complexes 5, 6 and 6d**

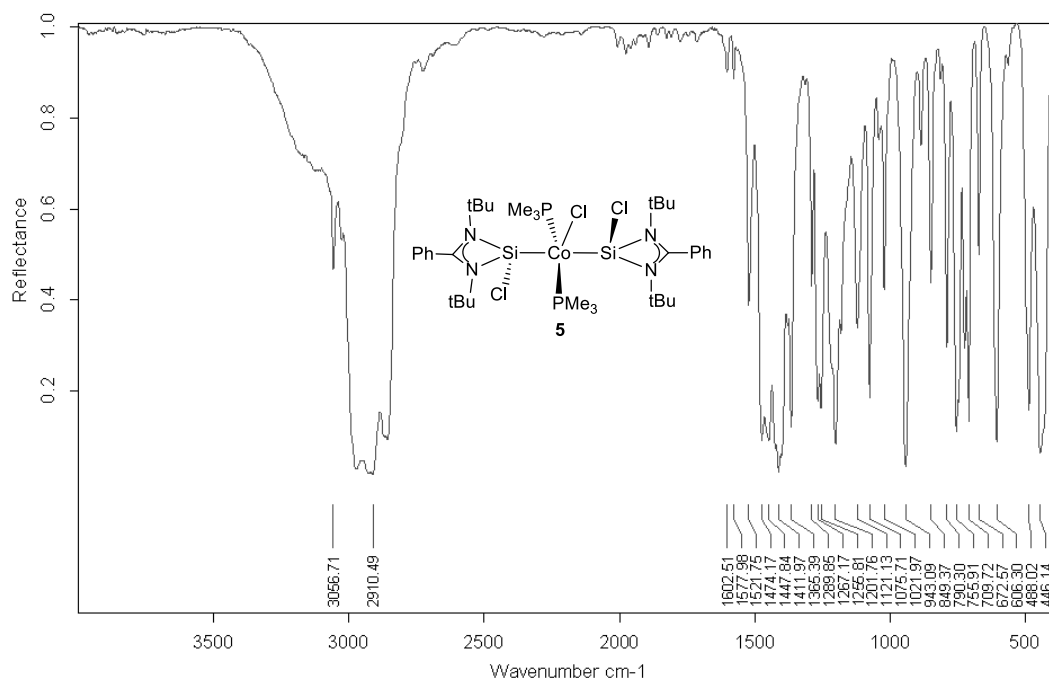

IR spectrum of complex 5

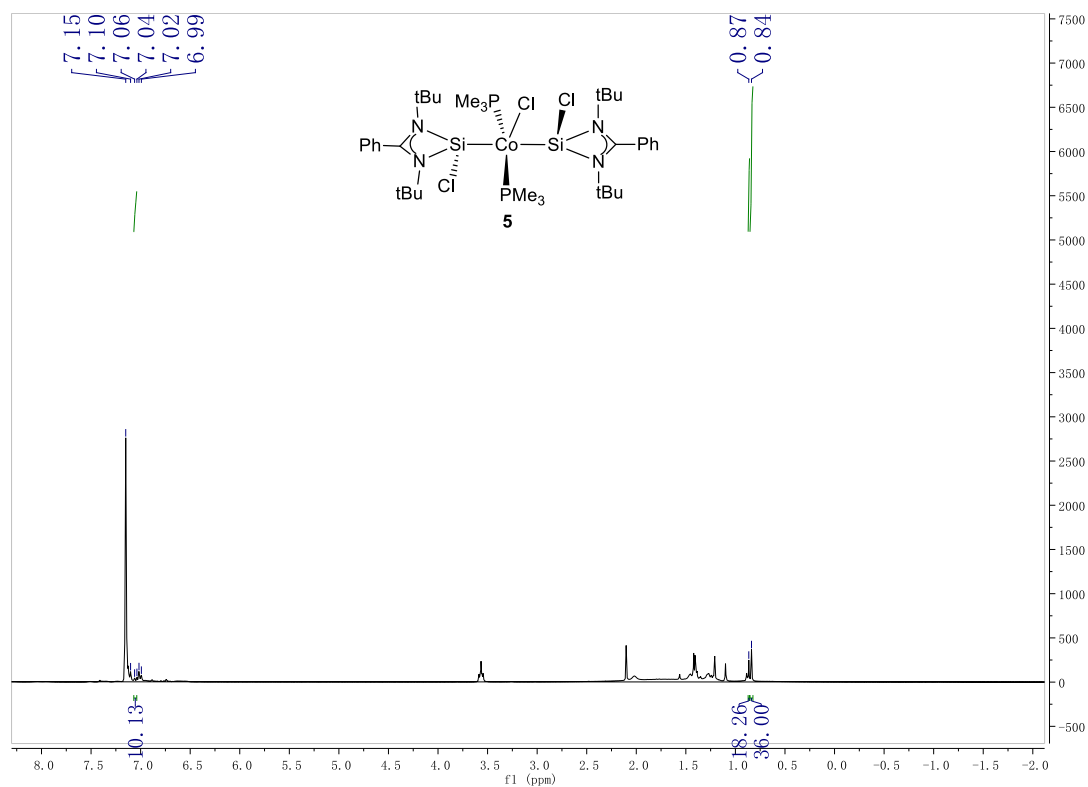

<sup>1</sup>H NMR of complex 5

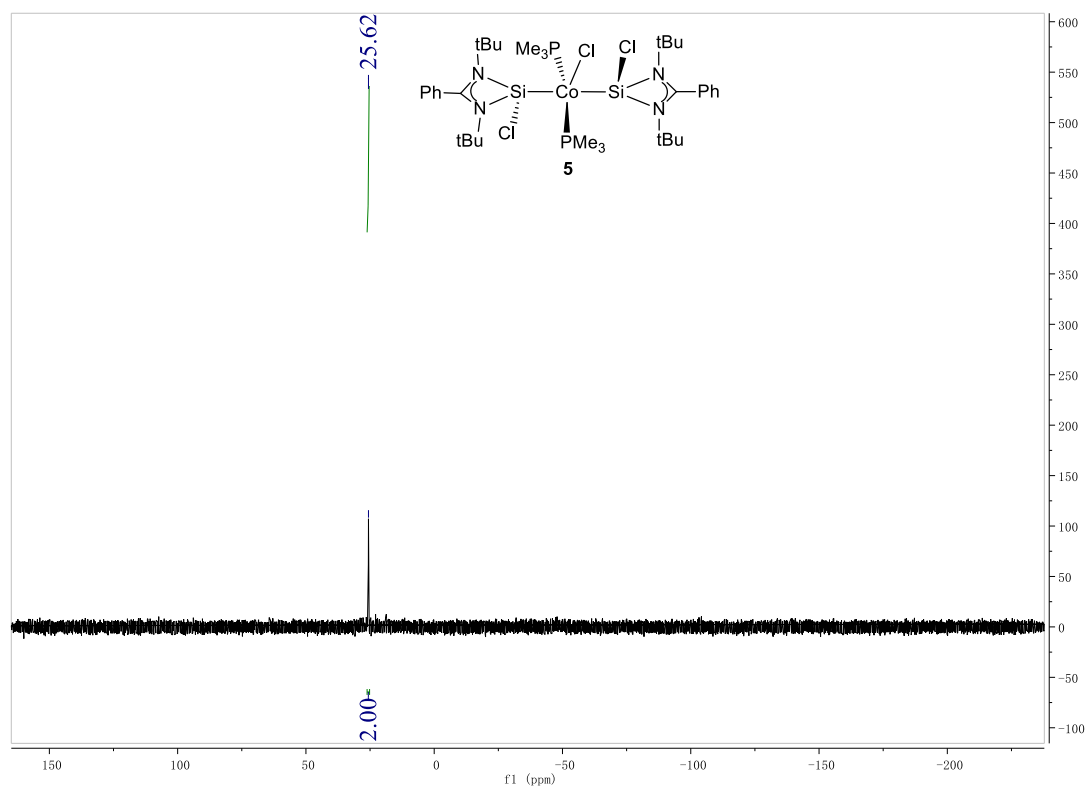

<sup>31</sup>P NMR of complex **5**

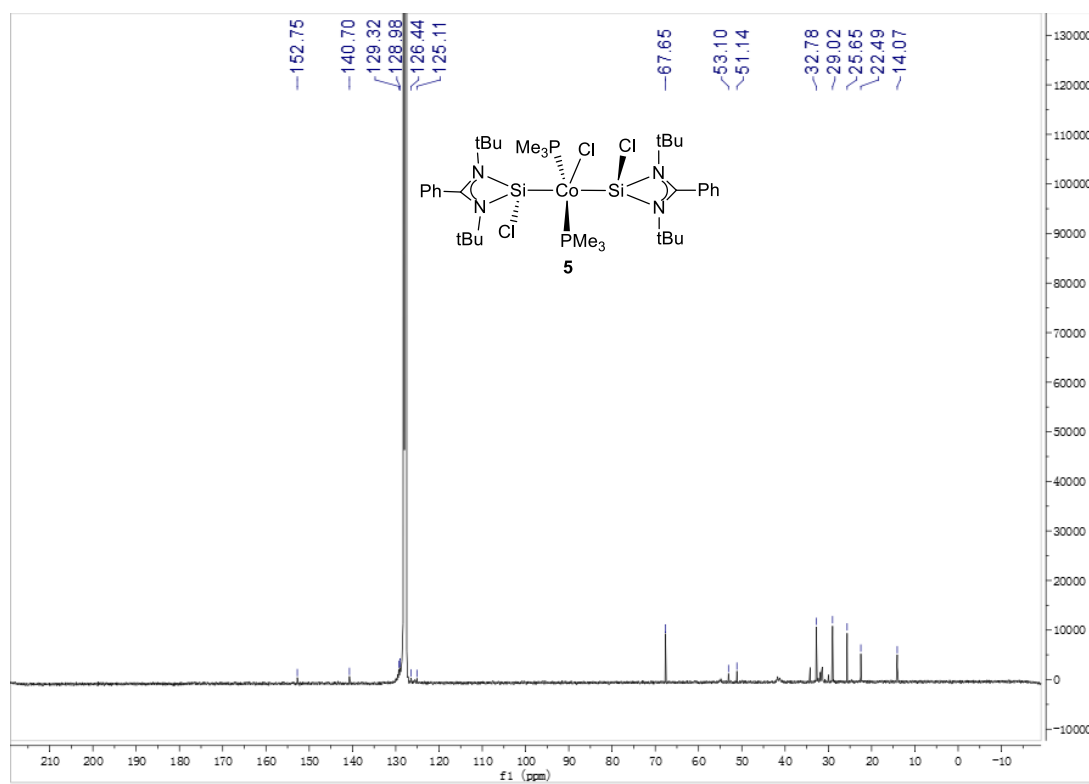

<sup>13</sup>C NMR of complex **5**

Note: The peaks at 67.65 and 25.65 ppm belong to THF.

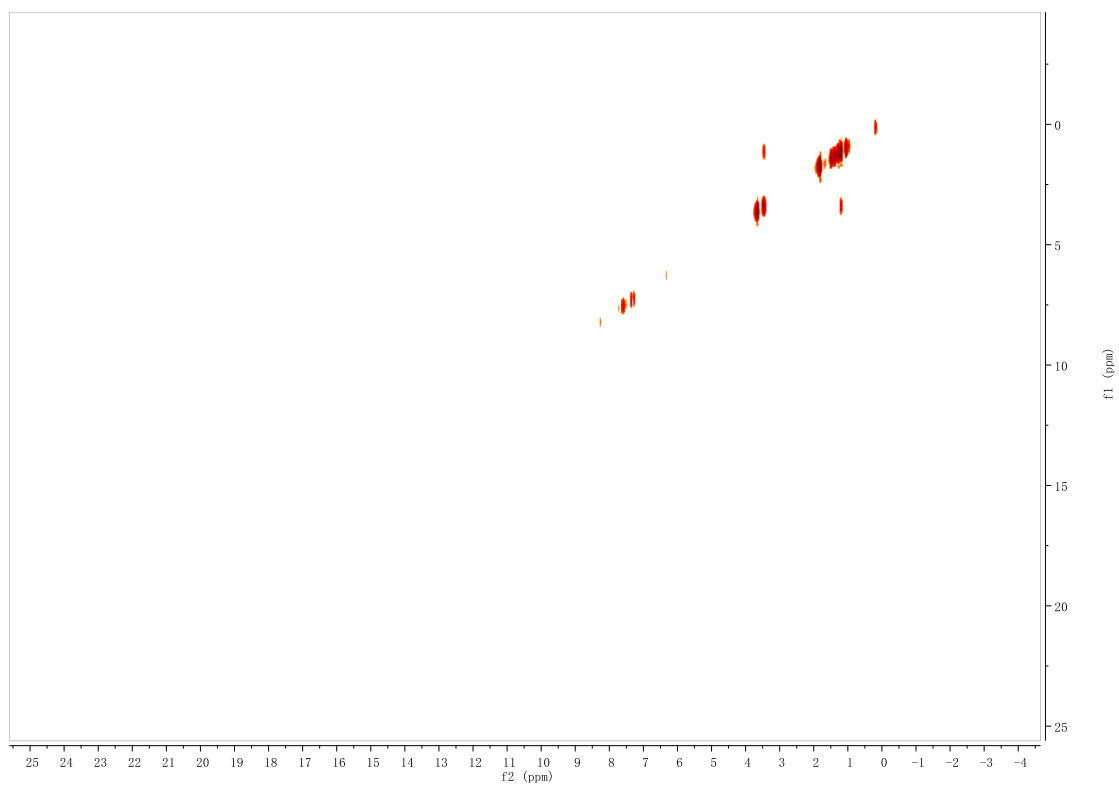

HH COSY of complex 5

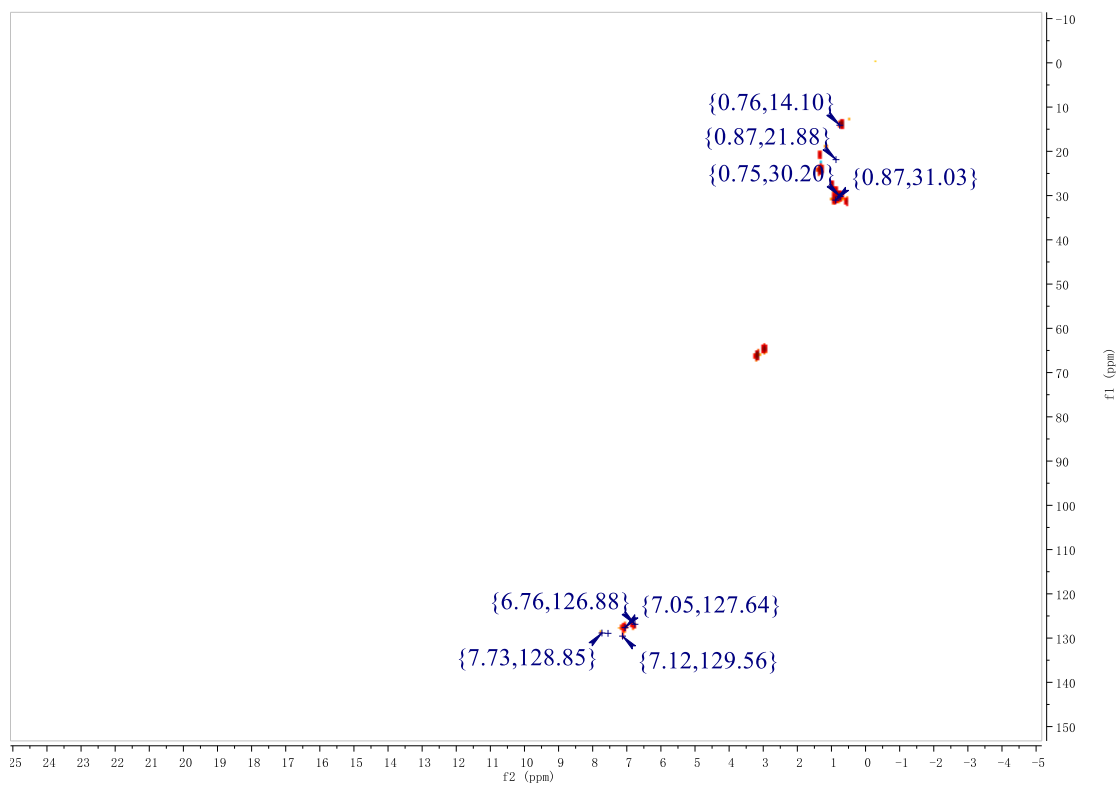

HSQC of complex 5

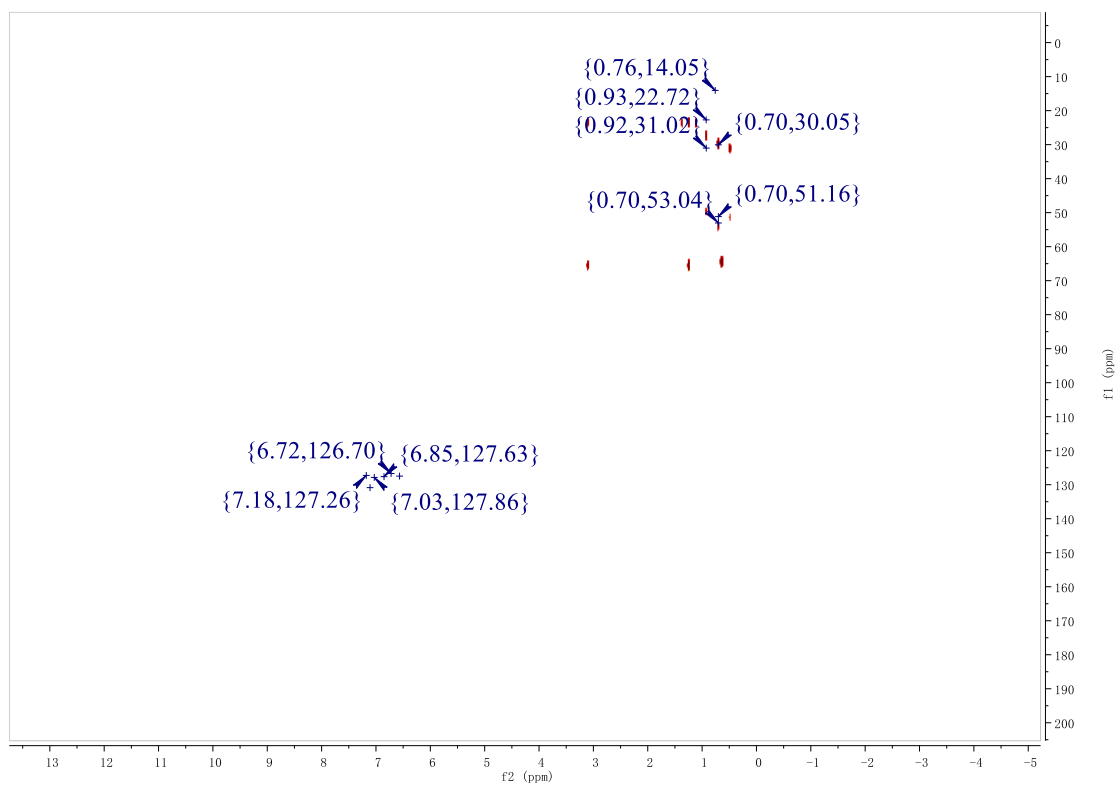

HMQC of complex **5**

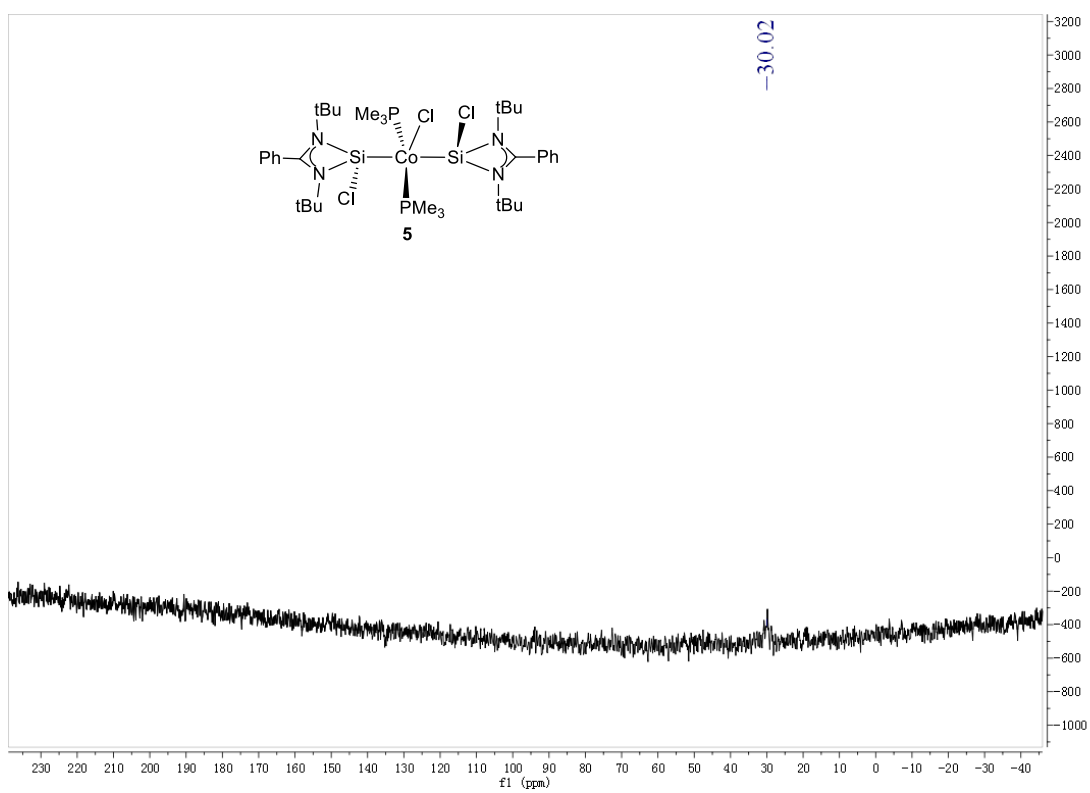

$^{29}\text{Si}$  NMR of complex **5**

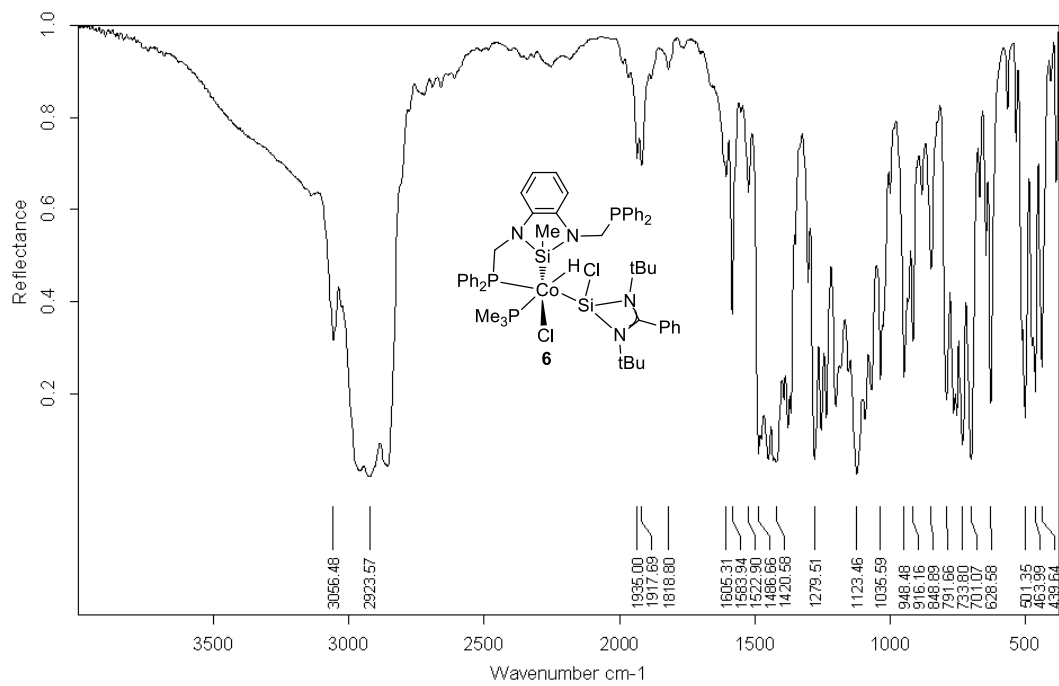

IR spectrum of complex **6**

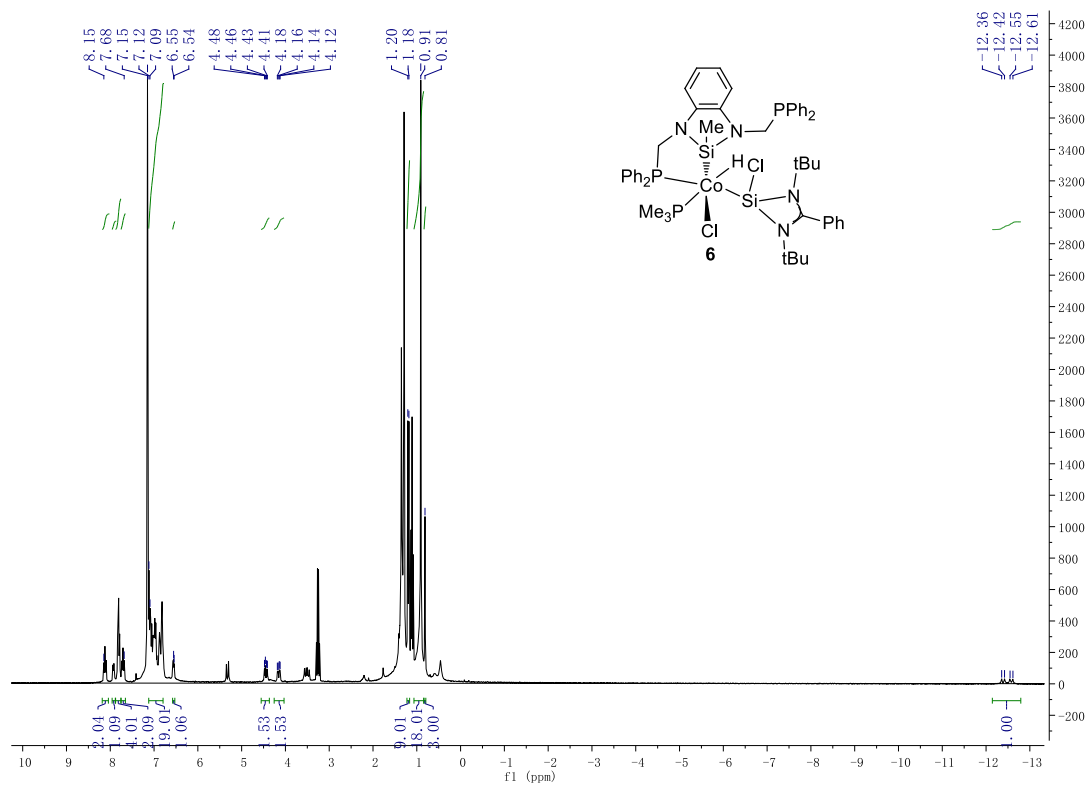

<sup>1</sup>H NMR of complex **6**

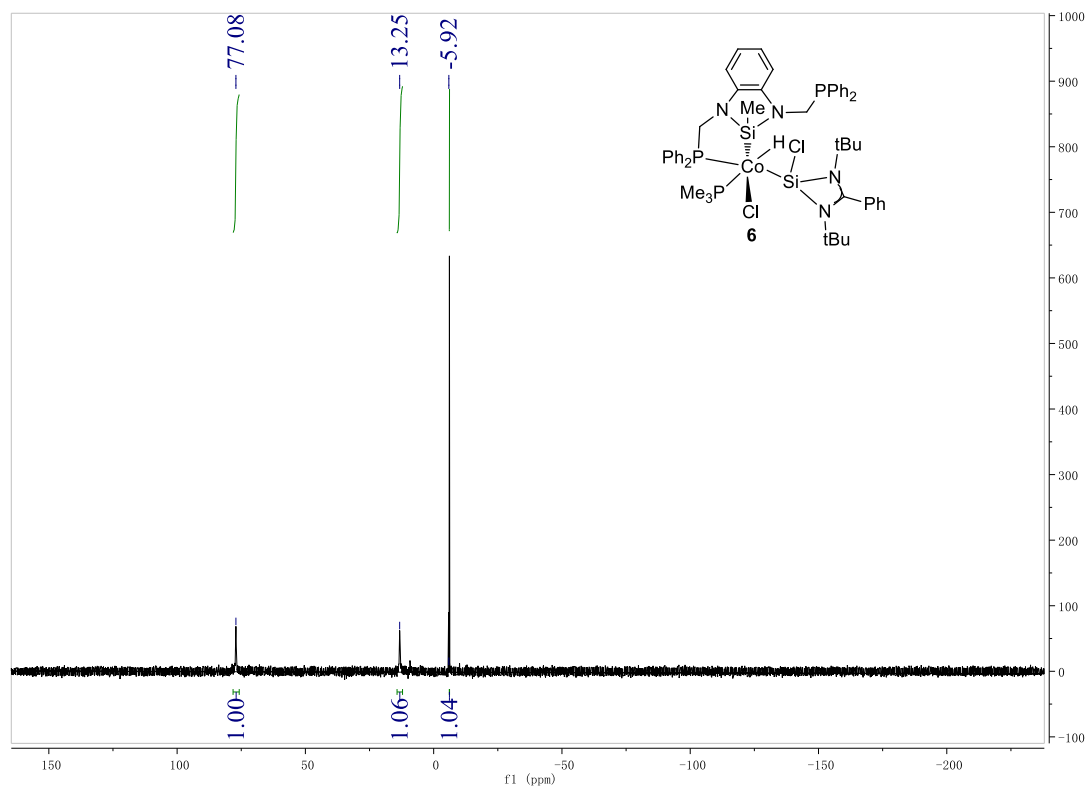

<sup>31</sup>P NMR of complex 6

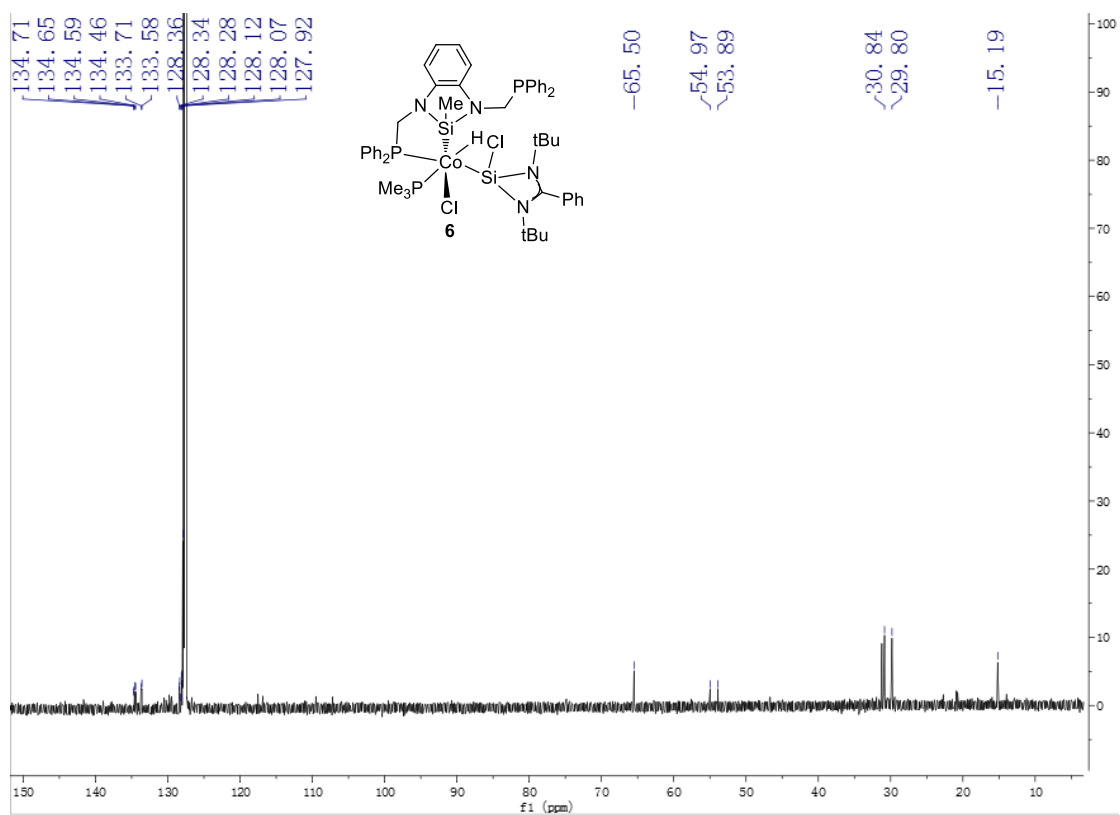

<sup>13</sup>C NMR of complex 6

Note: The peaks at 65.50 and 15.19 ppm belong to Et<sub>2</sub>O.



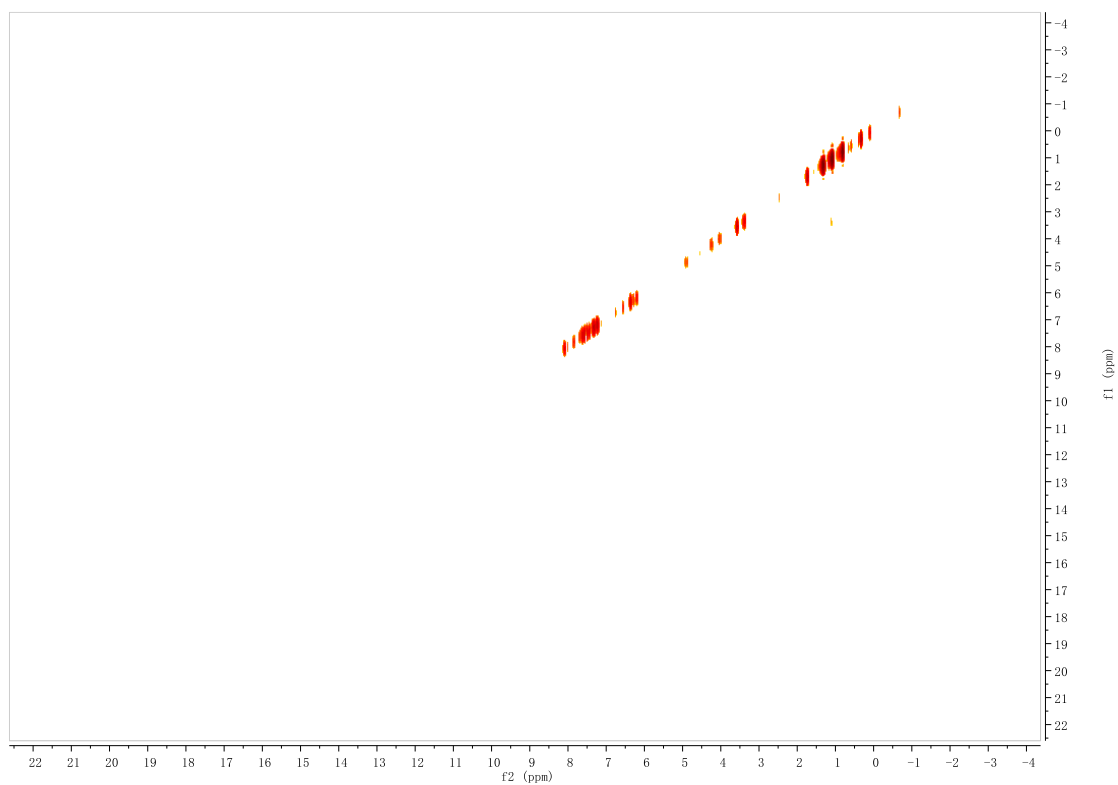

HH COSY of complex 6

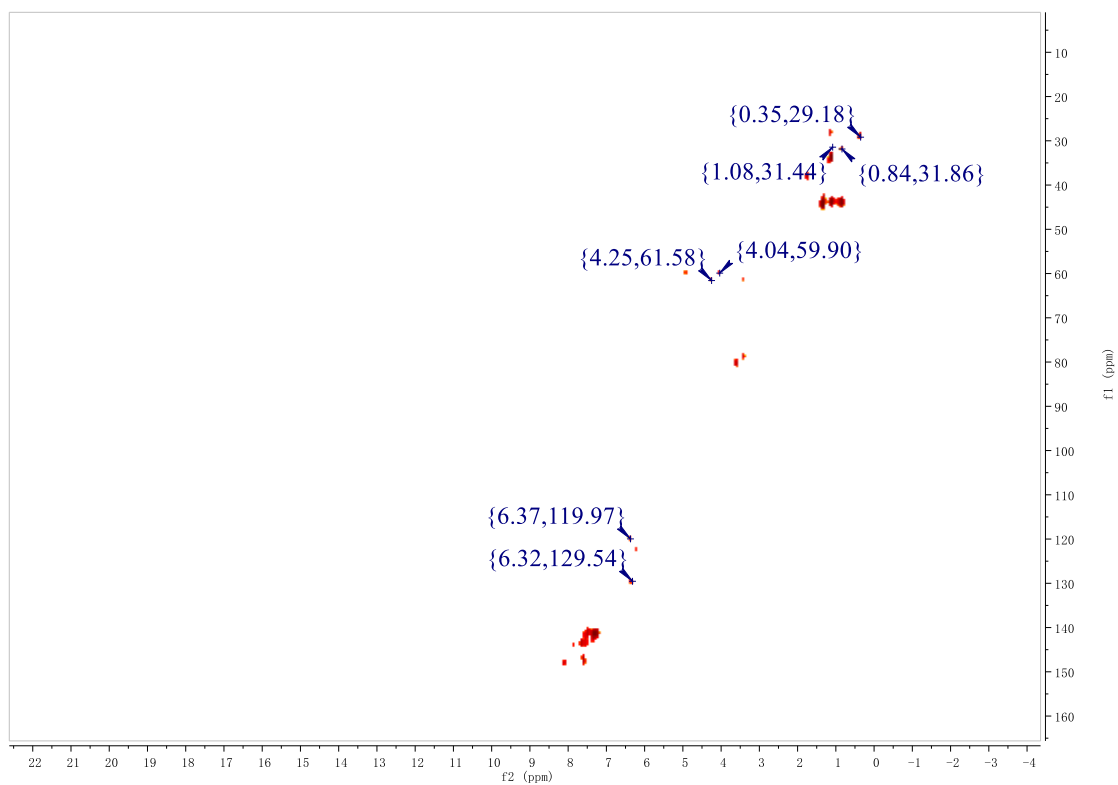

HSQC of complex 6

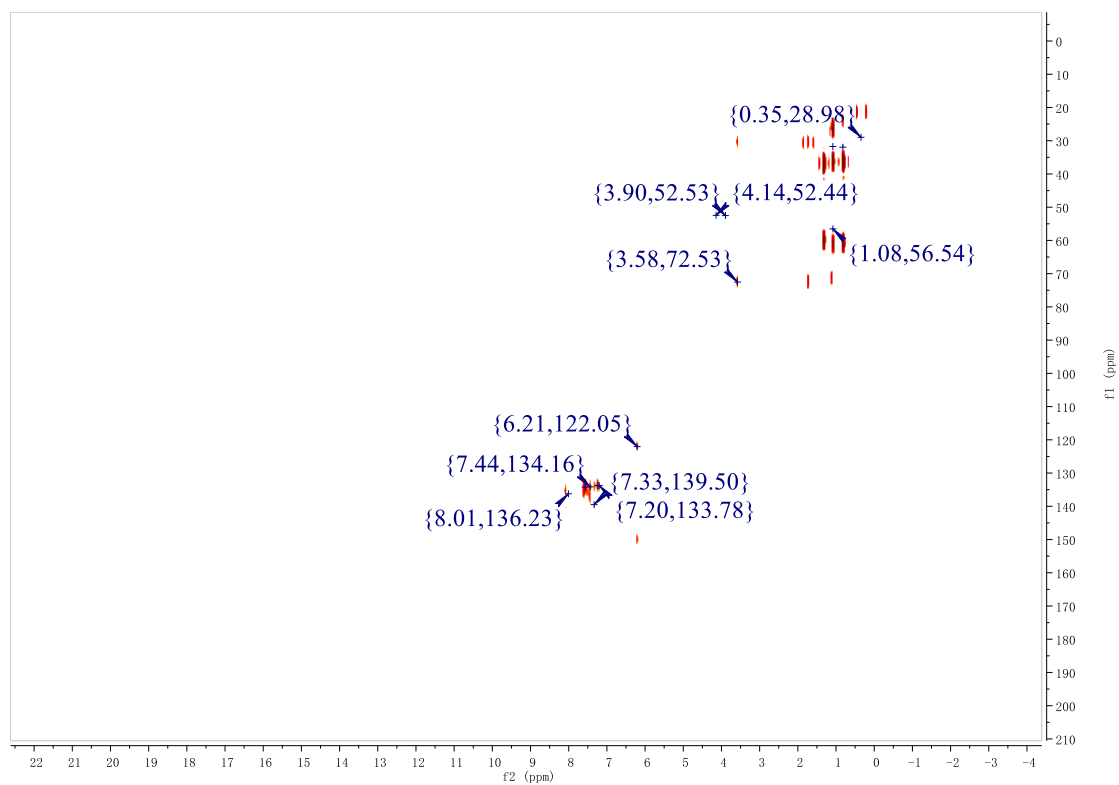

HMQC of complex **6**

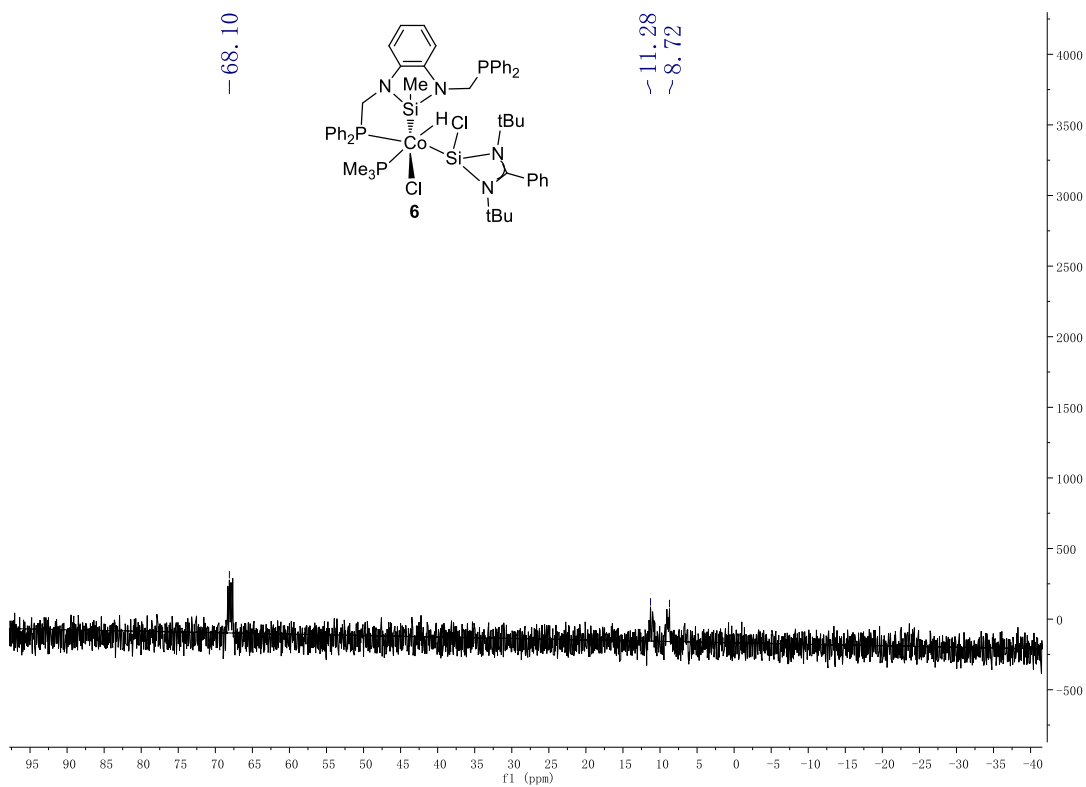

$^{29}\text{Si}$  NMR of complex **6**

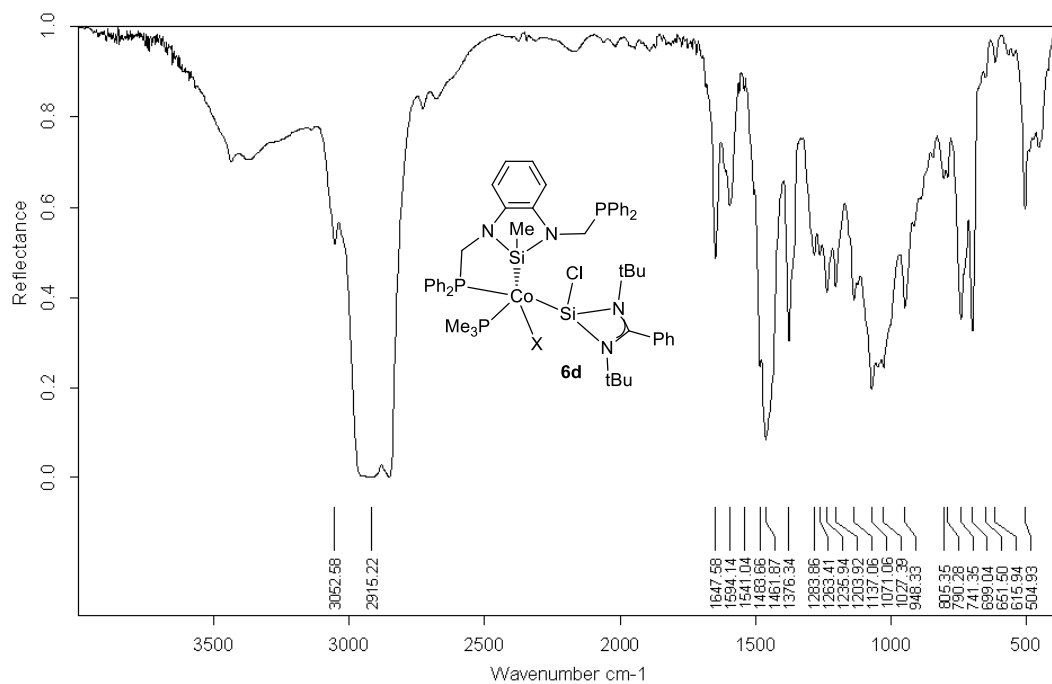

IR spectrum of complex **6d**

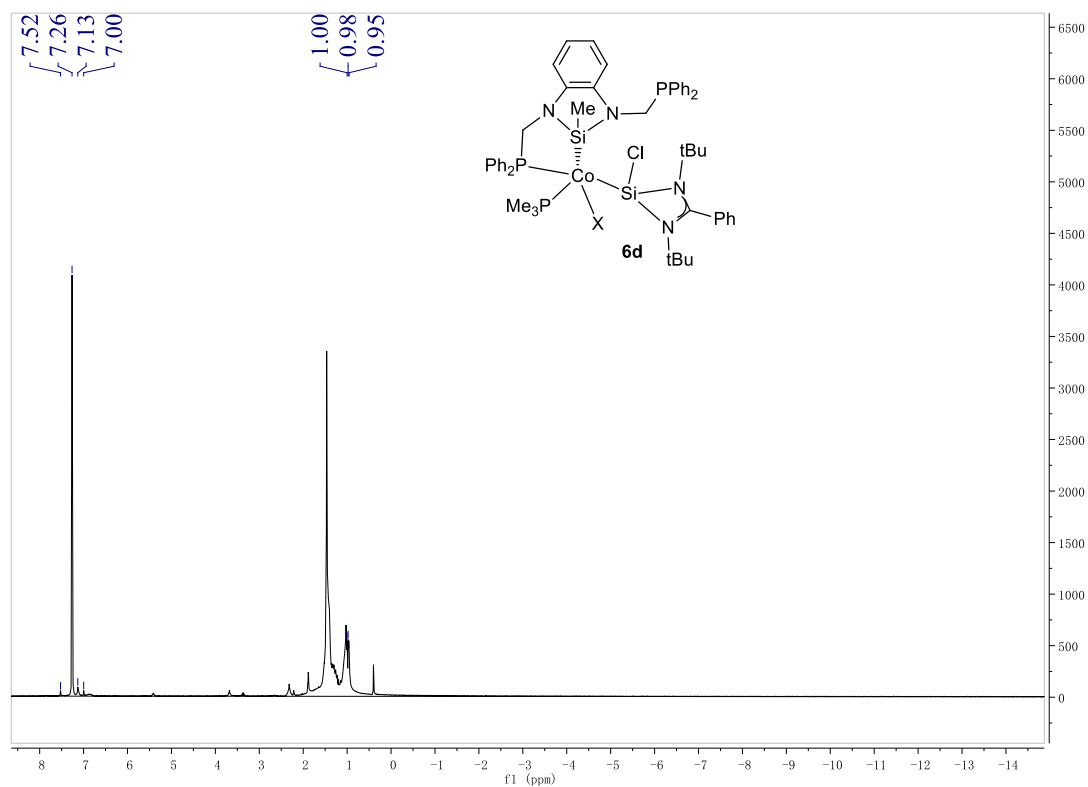

<sup>1</sup>H NMR of complex **6d**

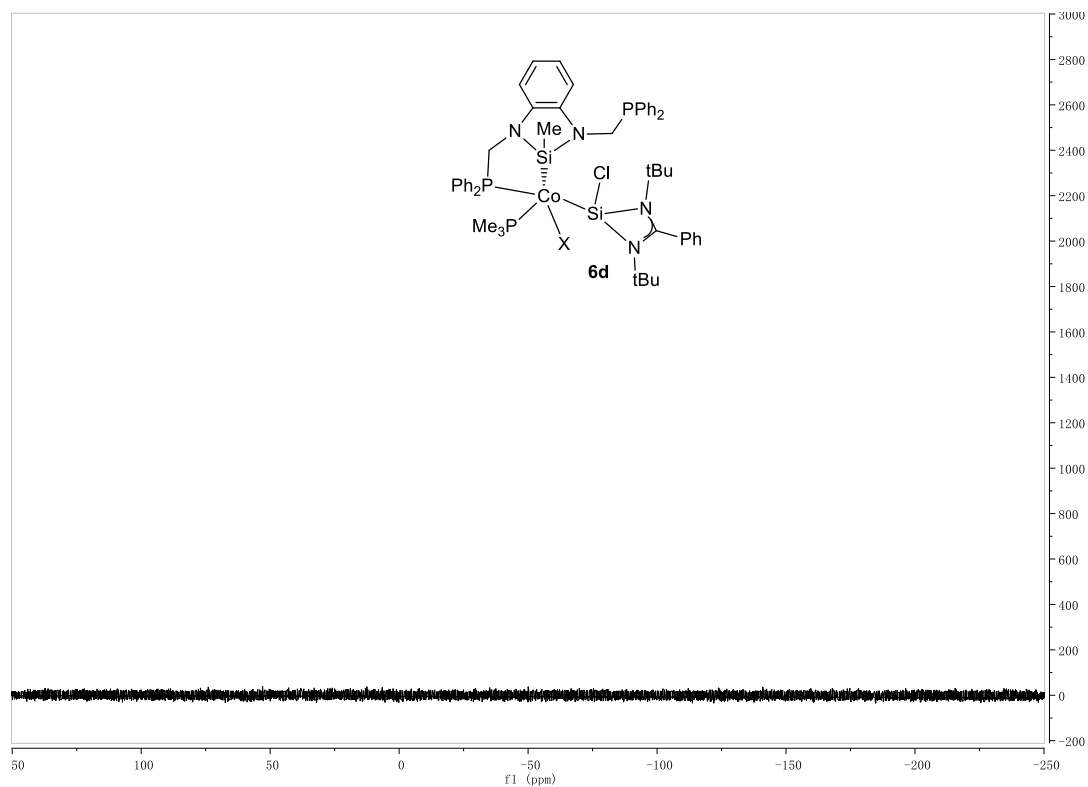

$^{31}\text{P}$  NMR of complex **6d**

### SIII $^1\text{H}$ and $^{13}\text{C}$ NMR spectra of coupling products

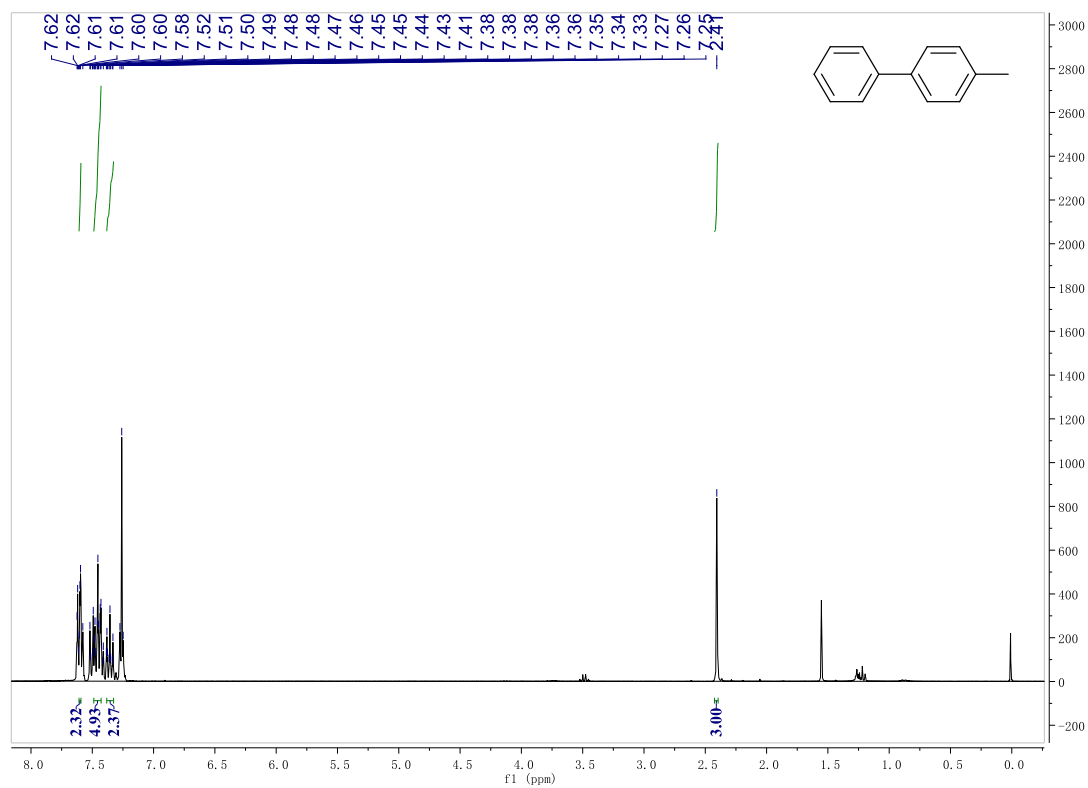

$^1\text{H}$  NMR of compound

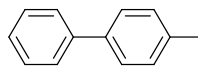

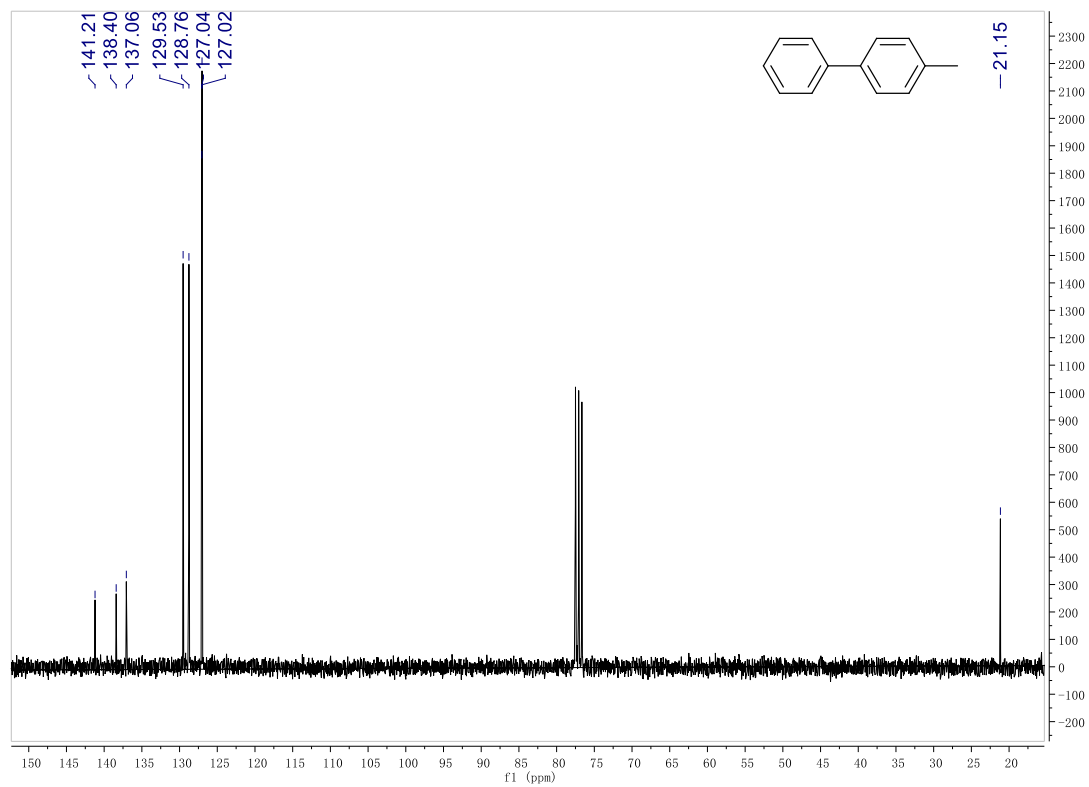

<sup>13</sup>C NMR of compound

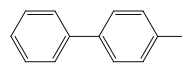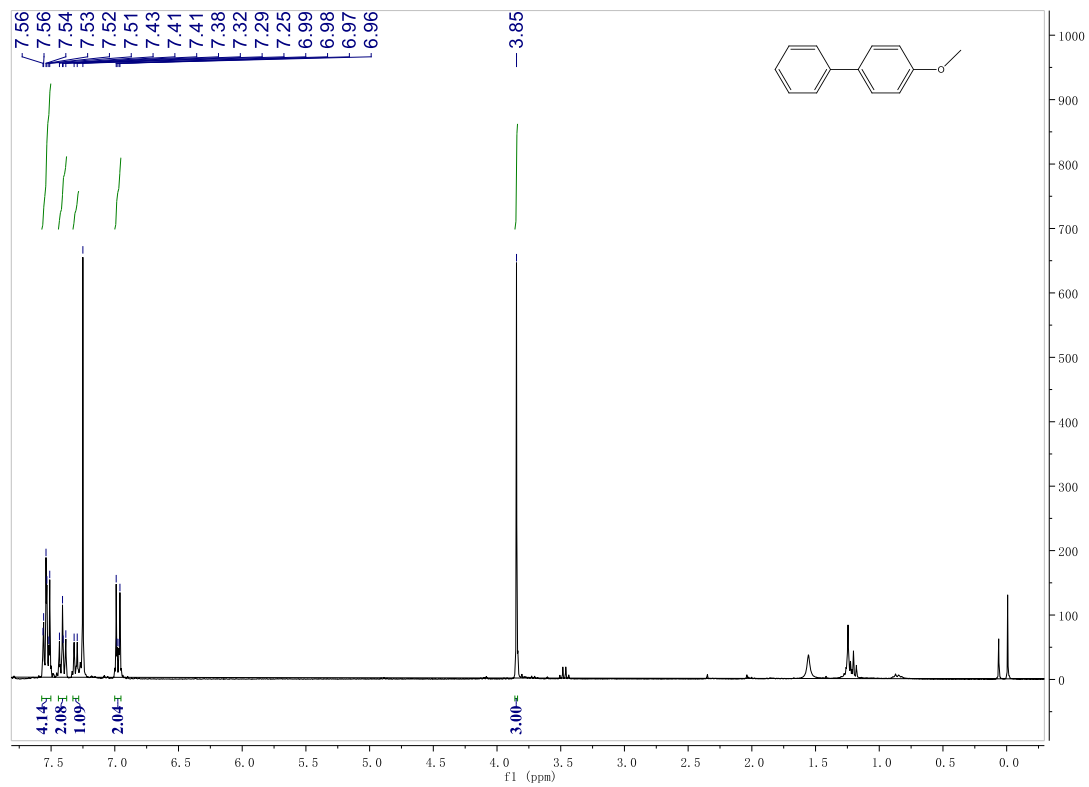

<sup>1</sup>H NMR of compound

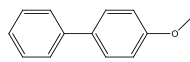

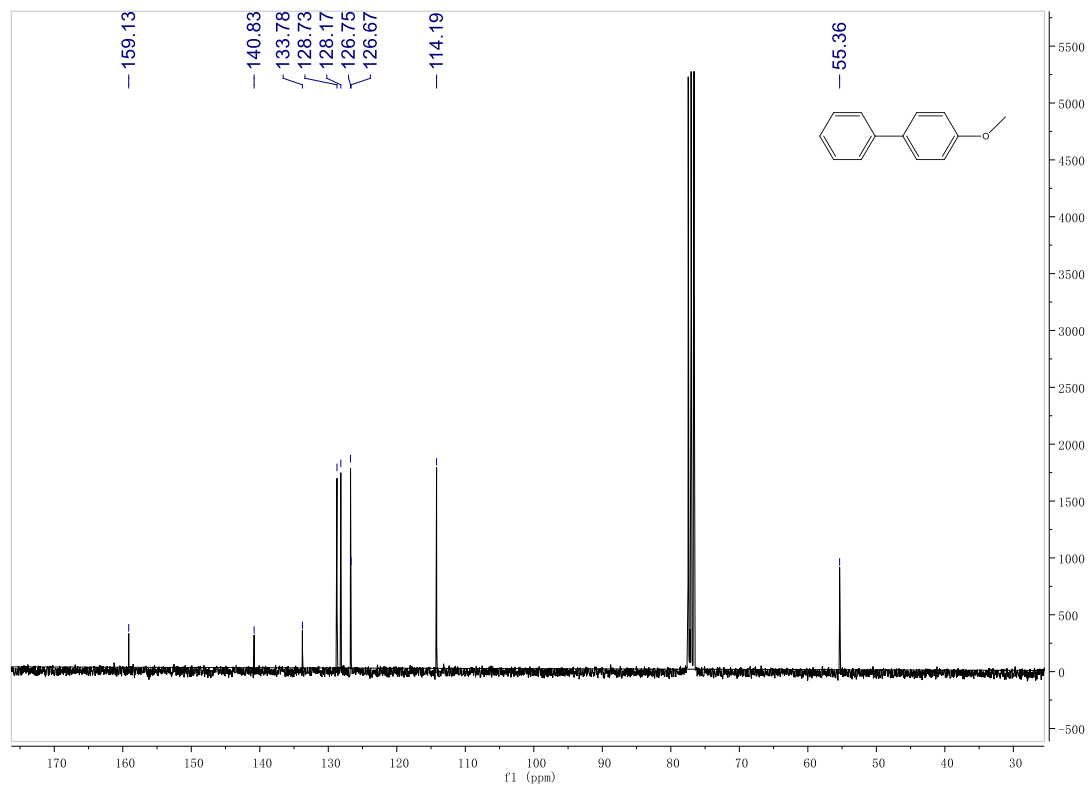

<sup>13</sup>C NMR of compound COc1ccc(cc1)-c2ccccc2

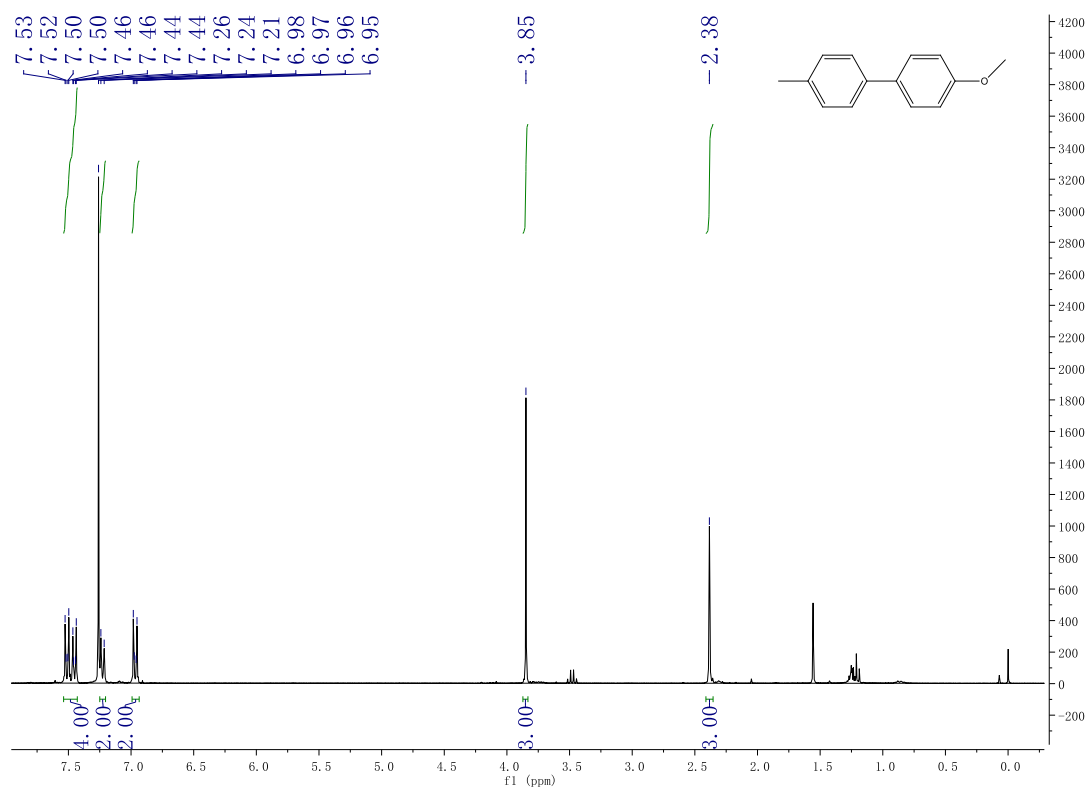

<sup>1</sup>H NMR of compound COc1ccc(cc1)-c2ccccc2

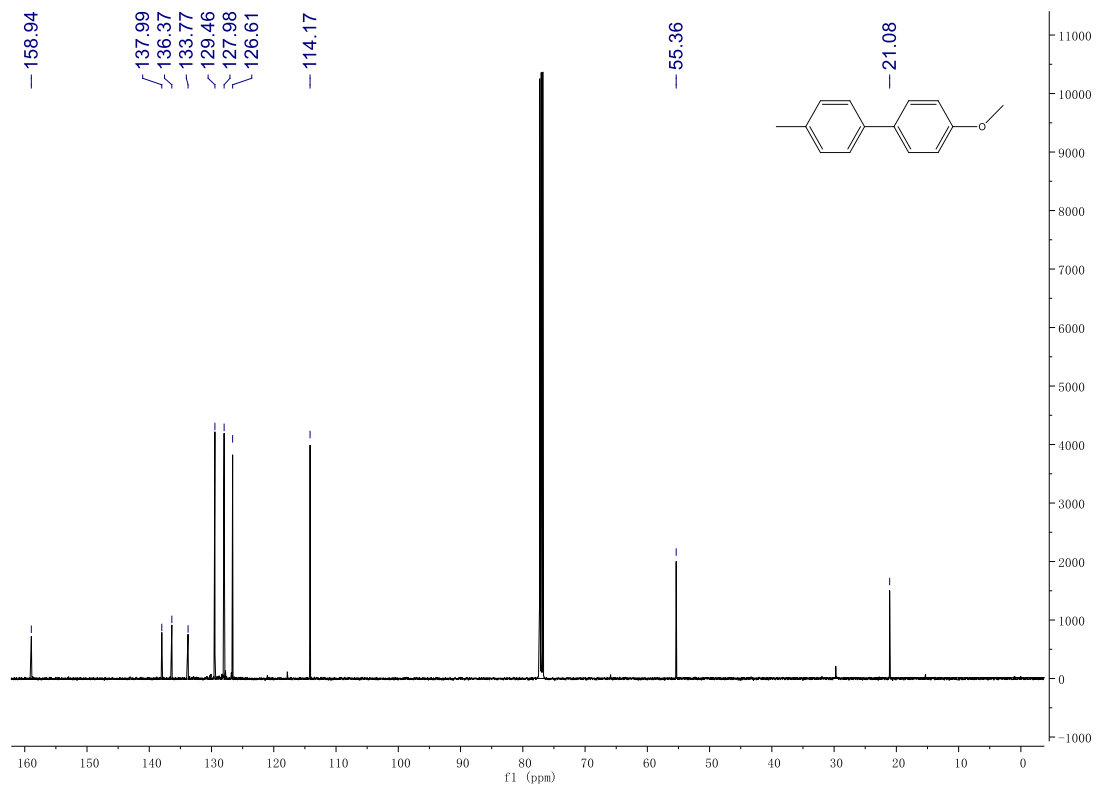

<sup>13</sup>C NMR of compound

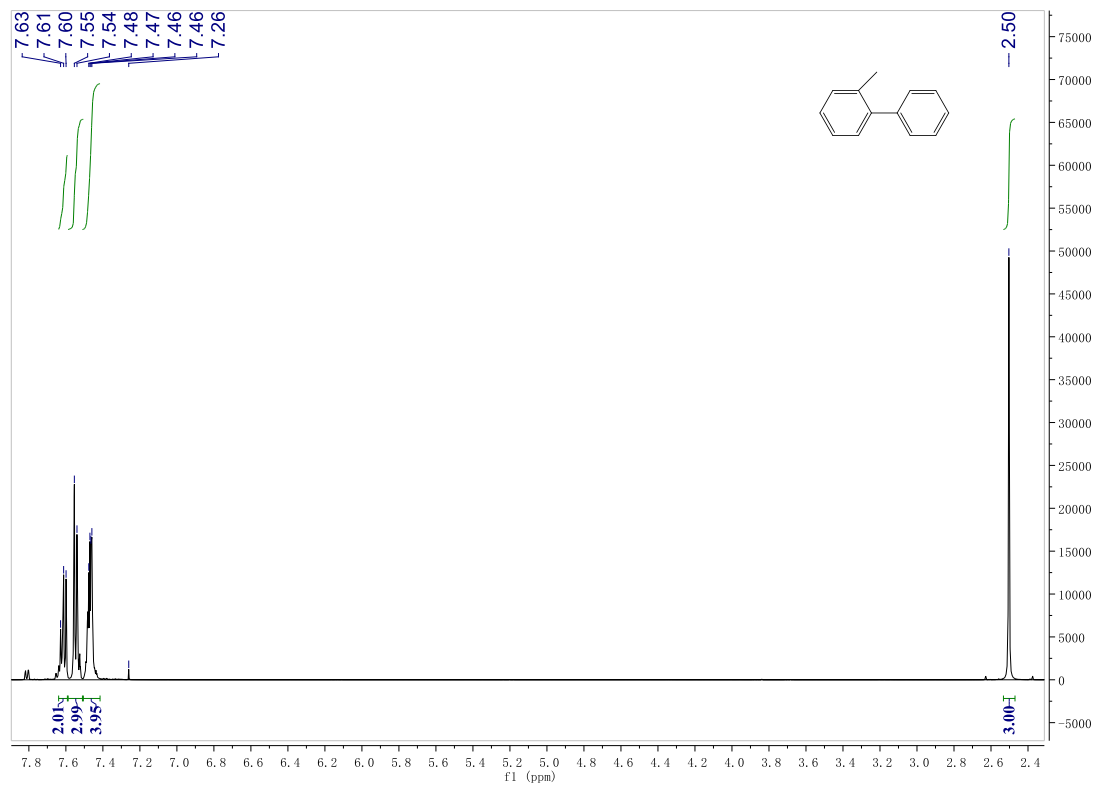

<sup>1</sup>H NMR of compound

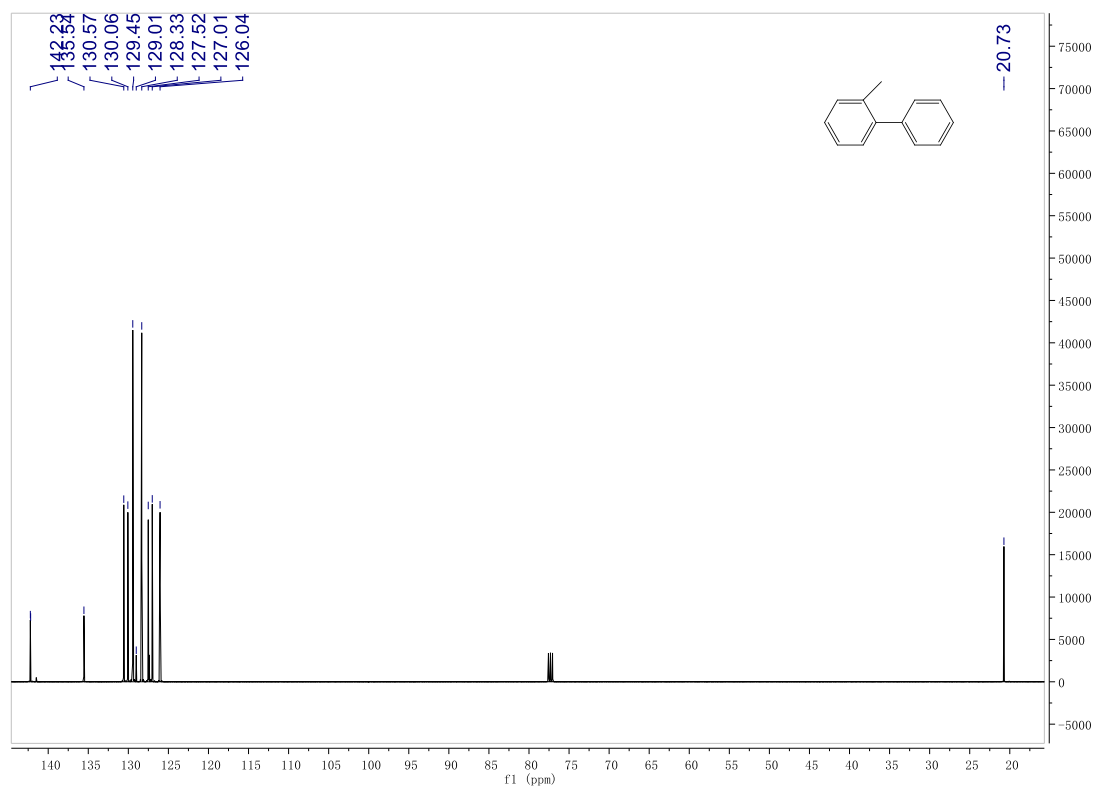

<sup>13</sup>C NMR of compound Cc1ccccc1-c2ccccc2

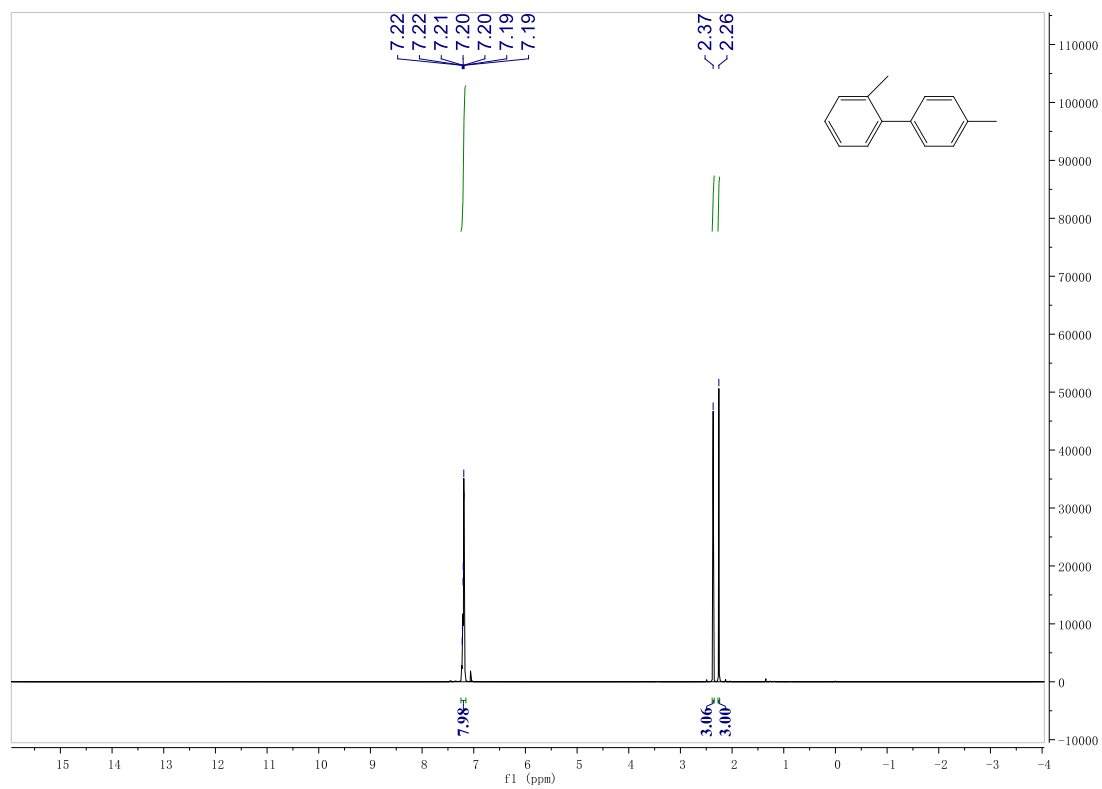

<sup>1</sup>H NMR of compound Cc1ccccc1-c2ccc(C)cc2



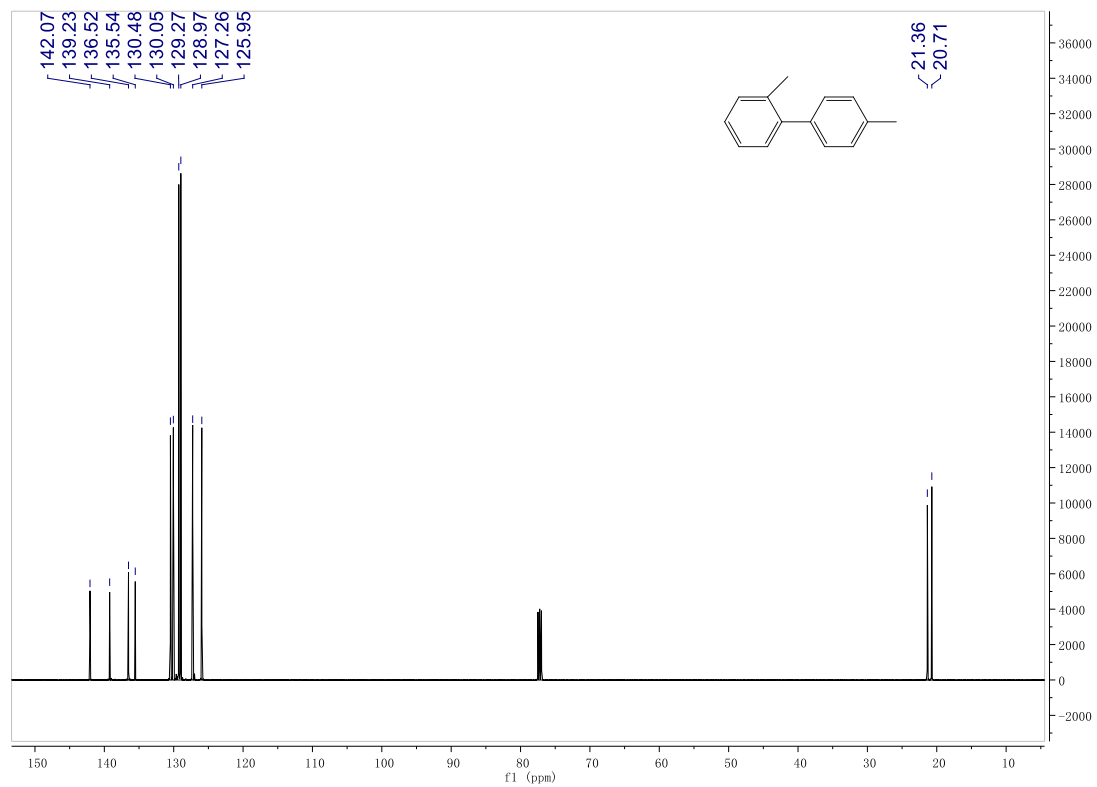

<sup>13</sup>C NMR of compound Cc1ccccc1-c2ccc(C)cc2

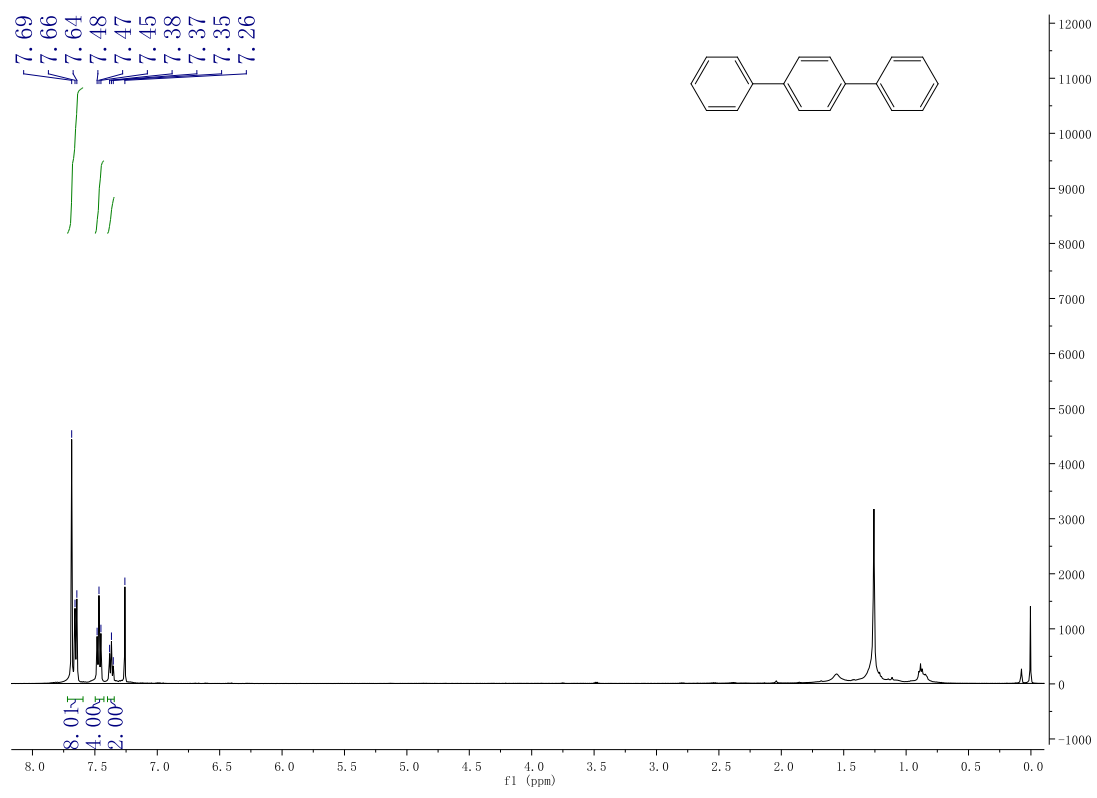

<sup>1</sup>H NMR of compound c1ccc(cc1)-c2ccc(cc2)-c3ccccc3

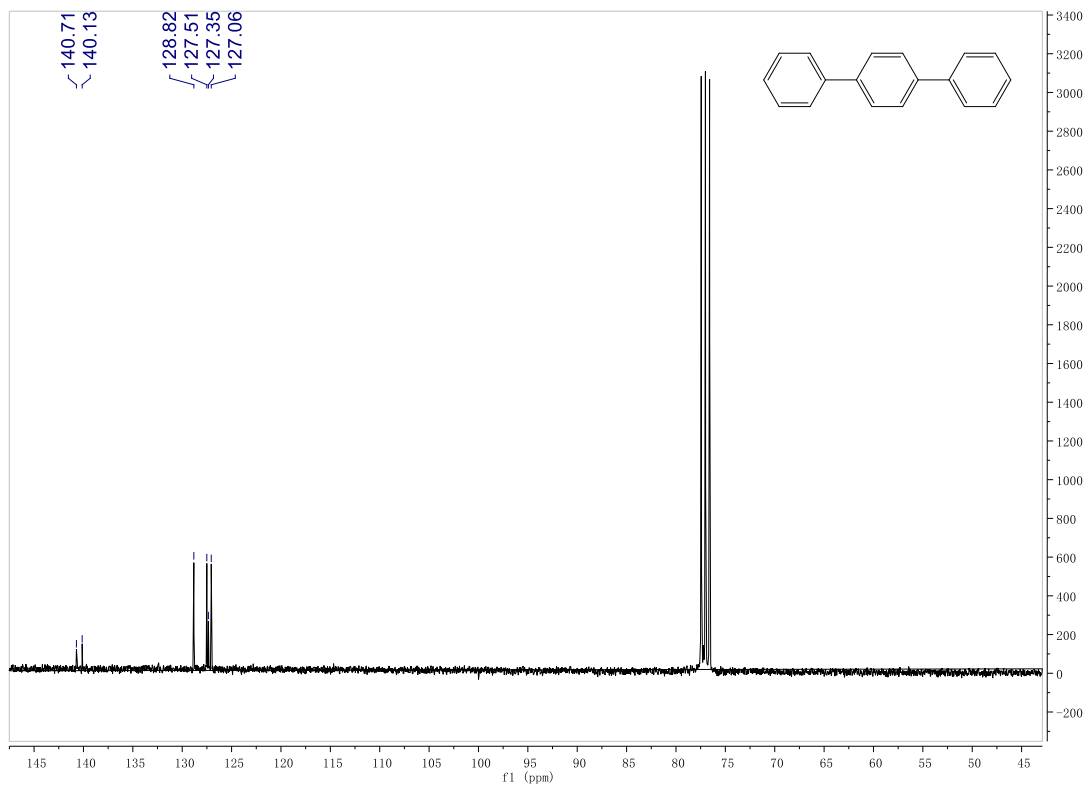

<sup>13</sup>C NMR of compound

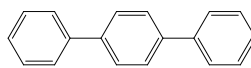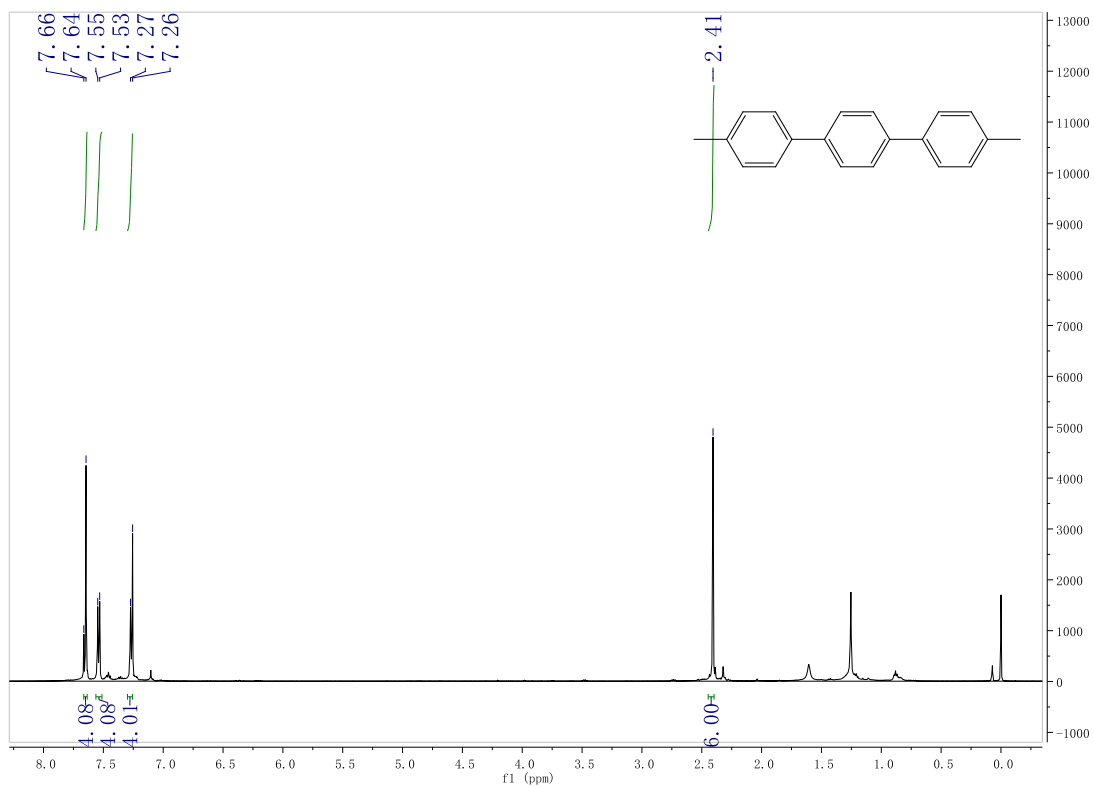

<sup>1</sup>H NMR of compound

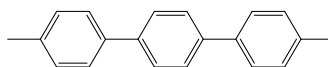

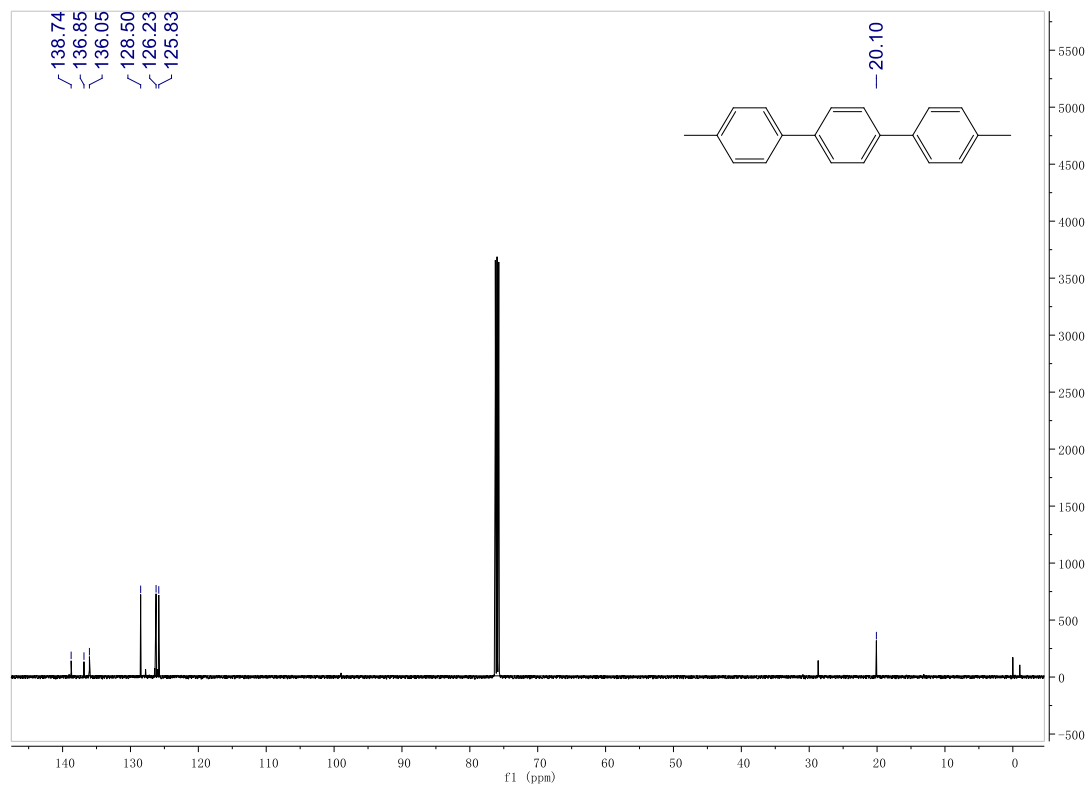

<sup>13</sup>C NMR of compound

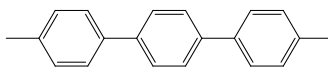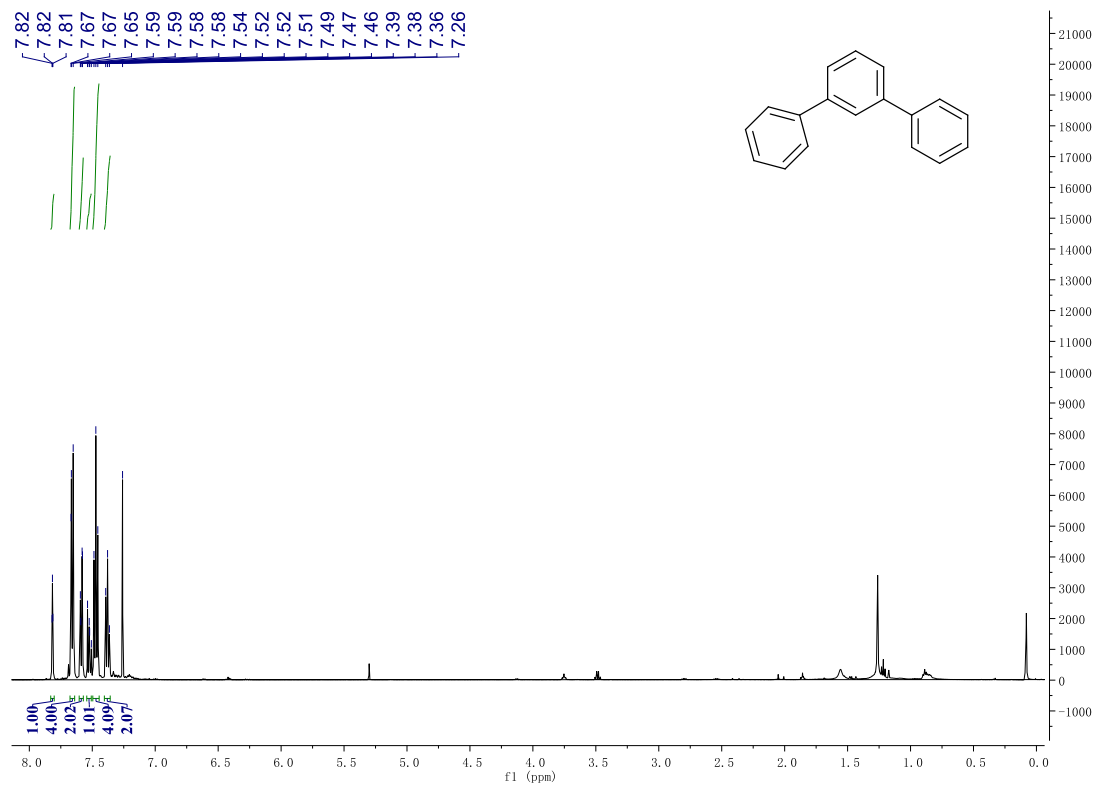

<sup>1</sup>H NMR of compound

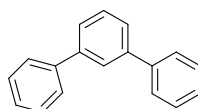

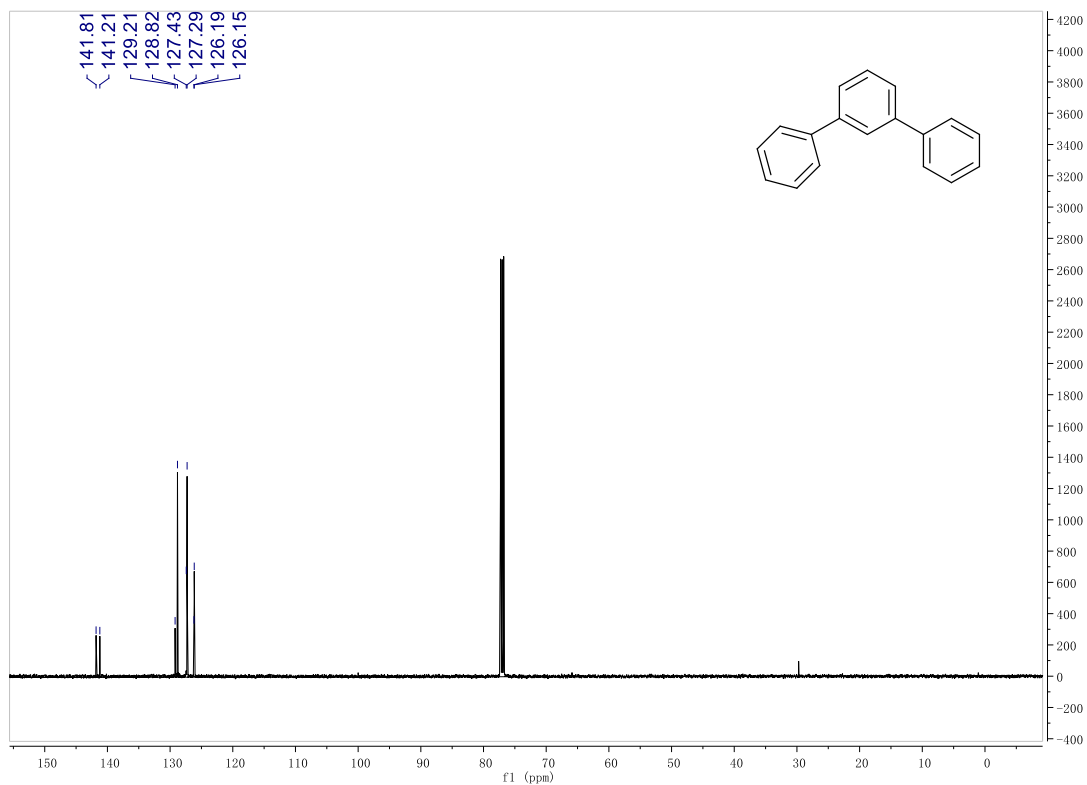

<sup>13</sup>C NMR of compound

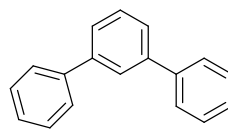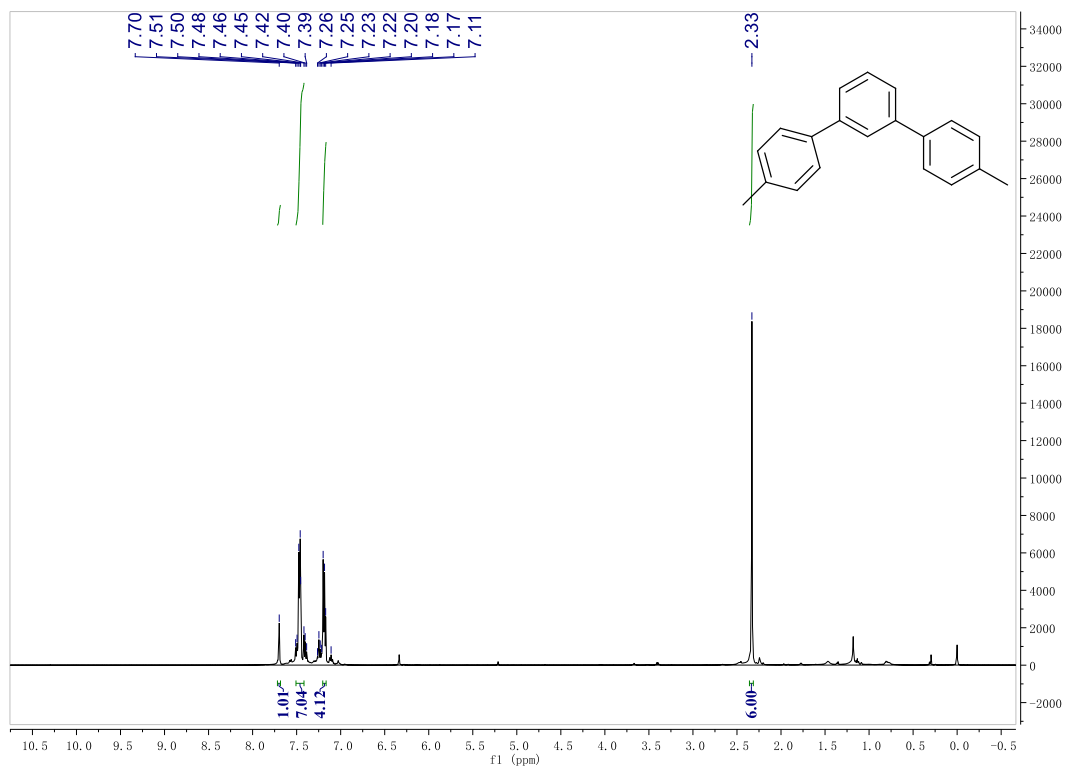

<sup>1</sup>H NMR of compound

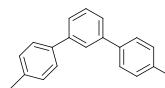

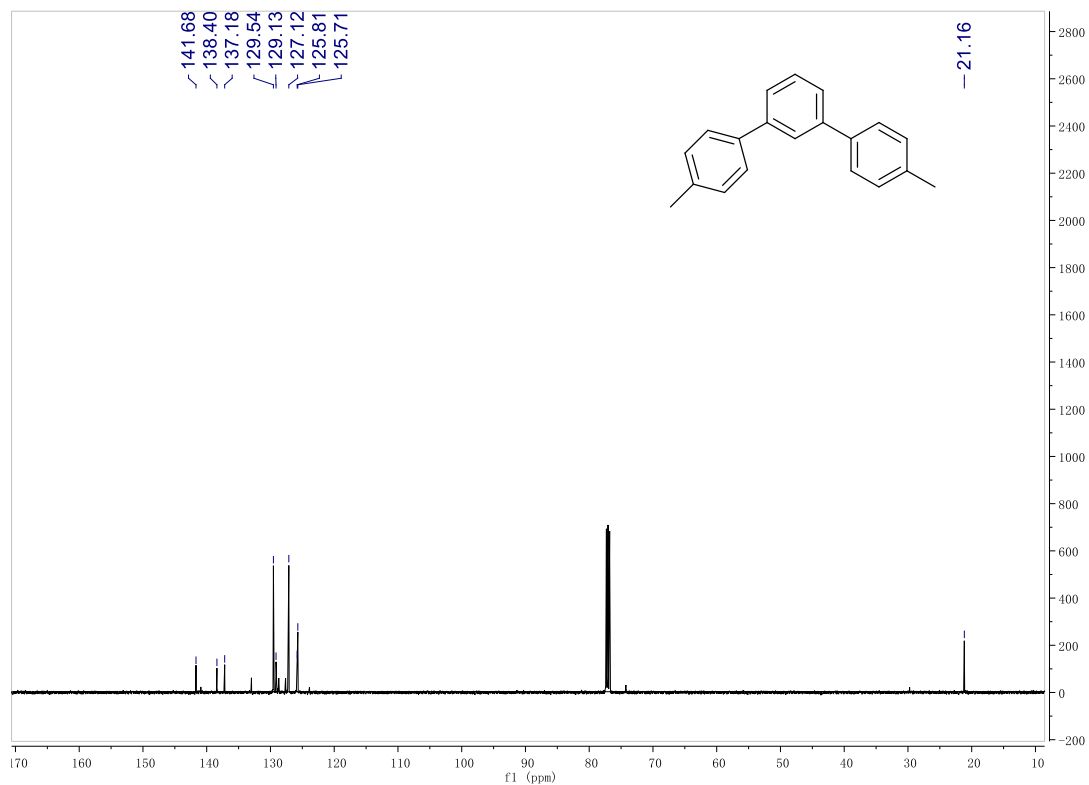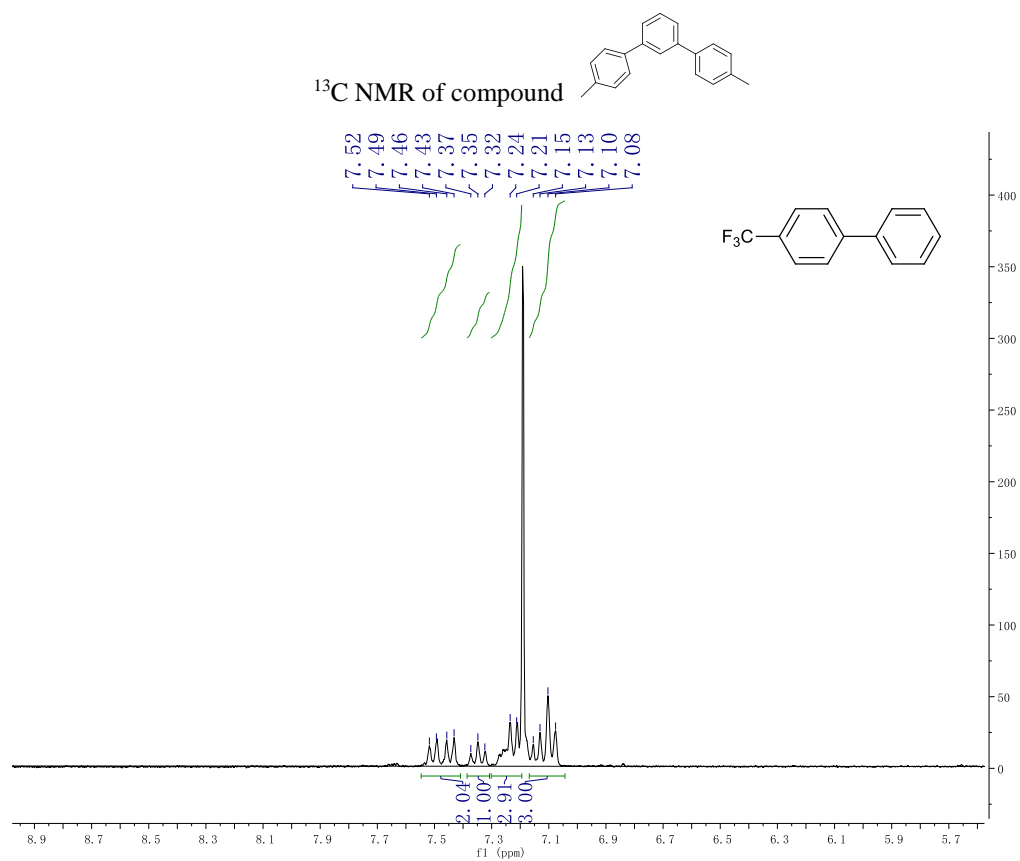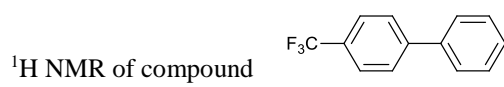

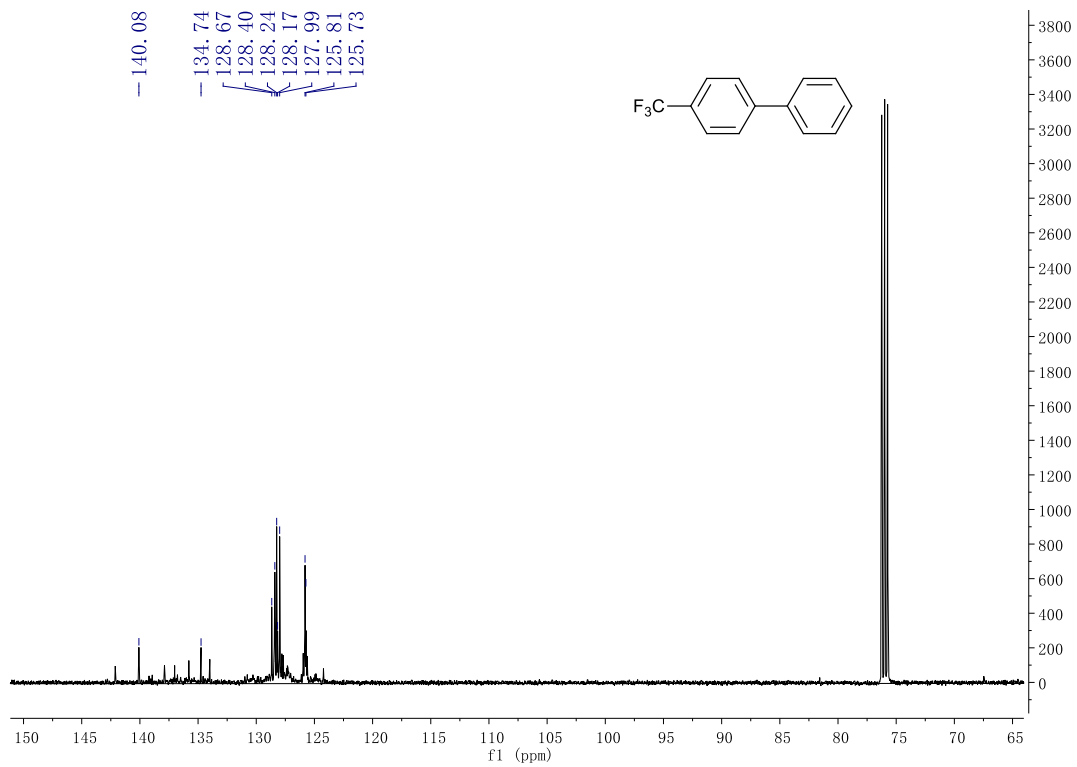

<sup>13</sup>C NMR of compound

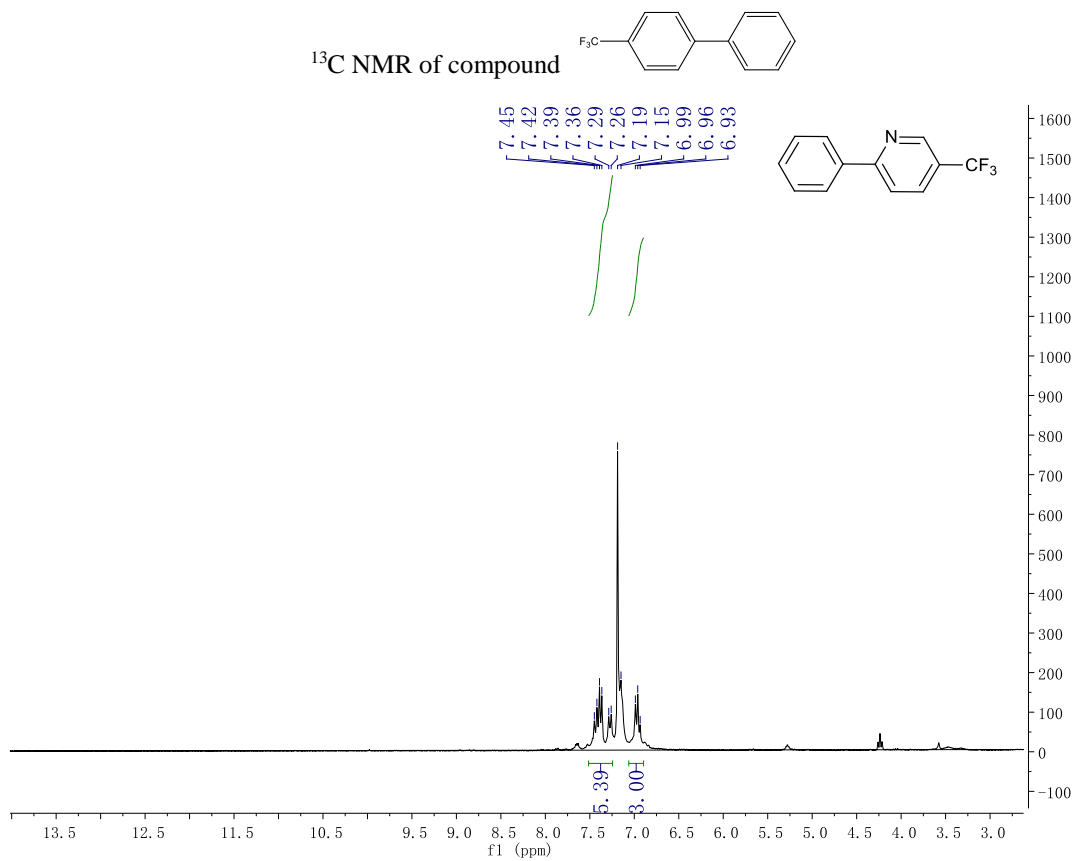

<sup>1</sup>H NMR of compound

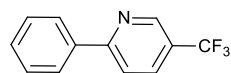

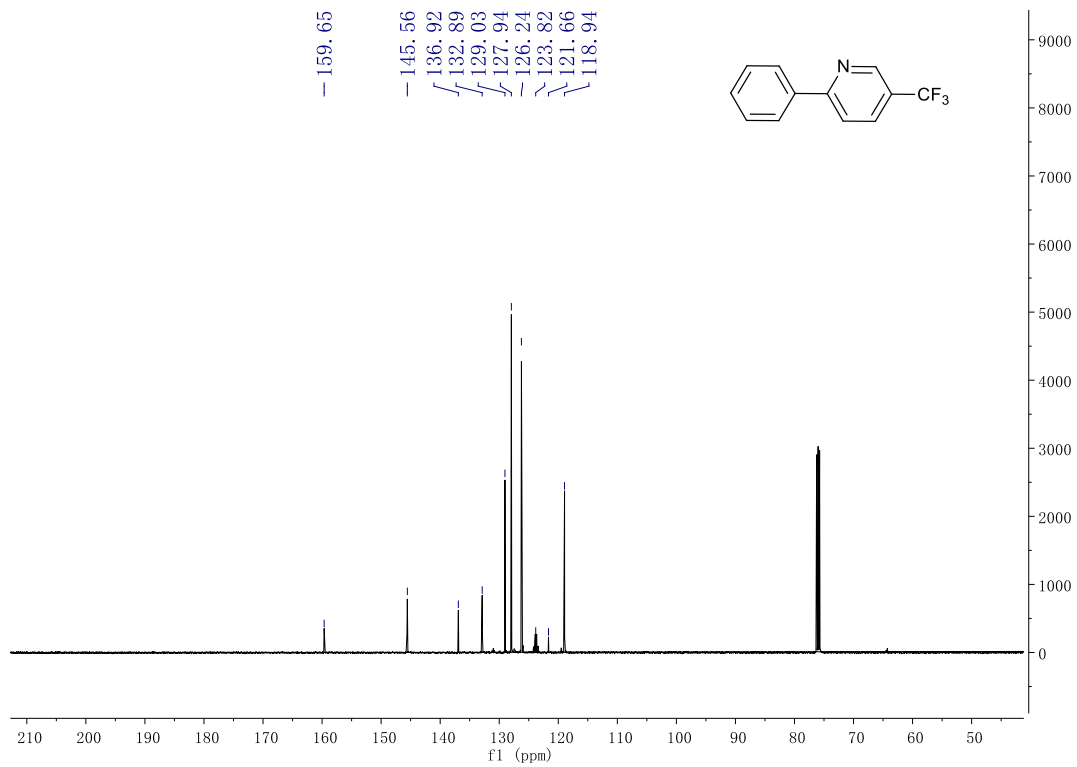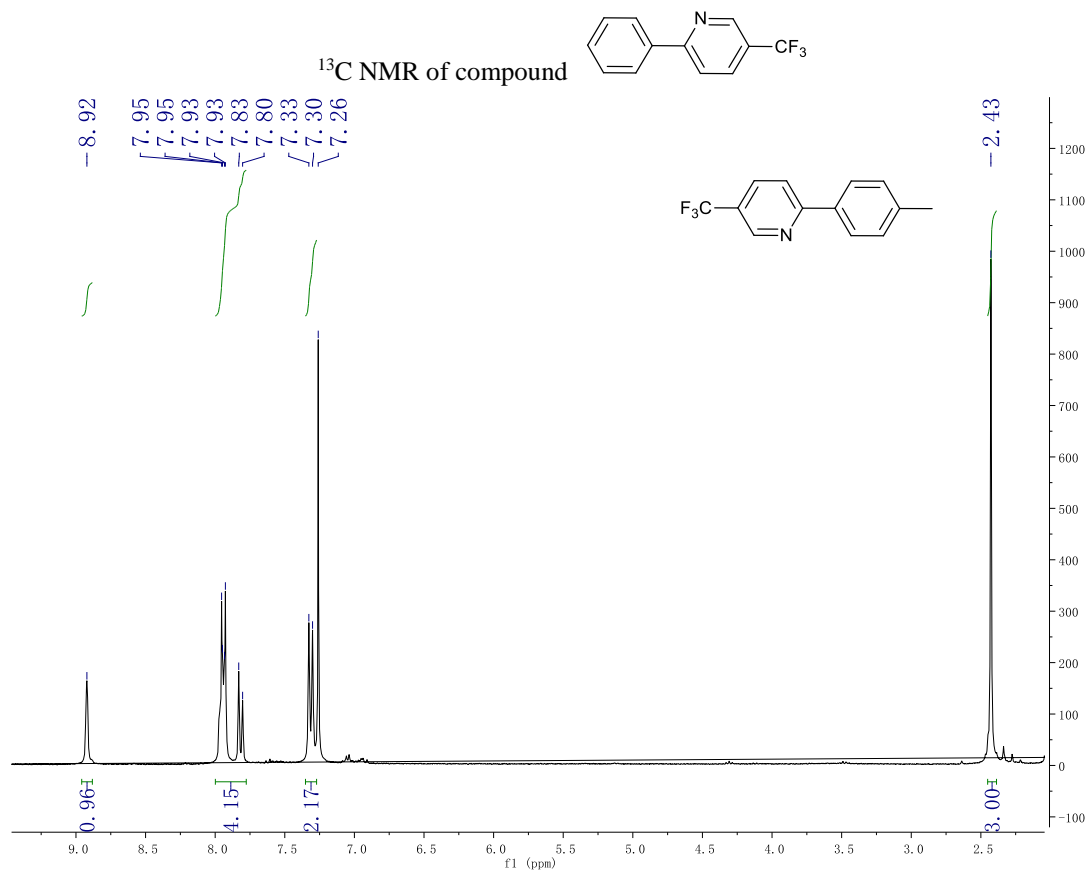

<sup>1</sup>H NMR of compound

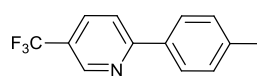

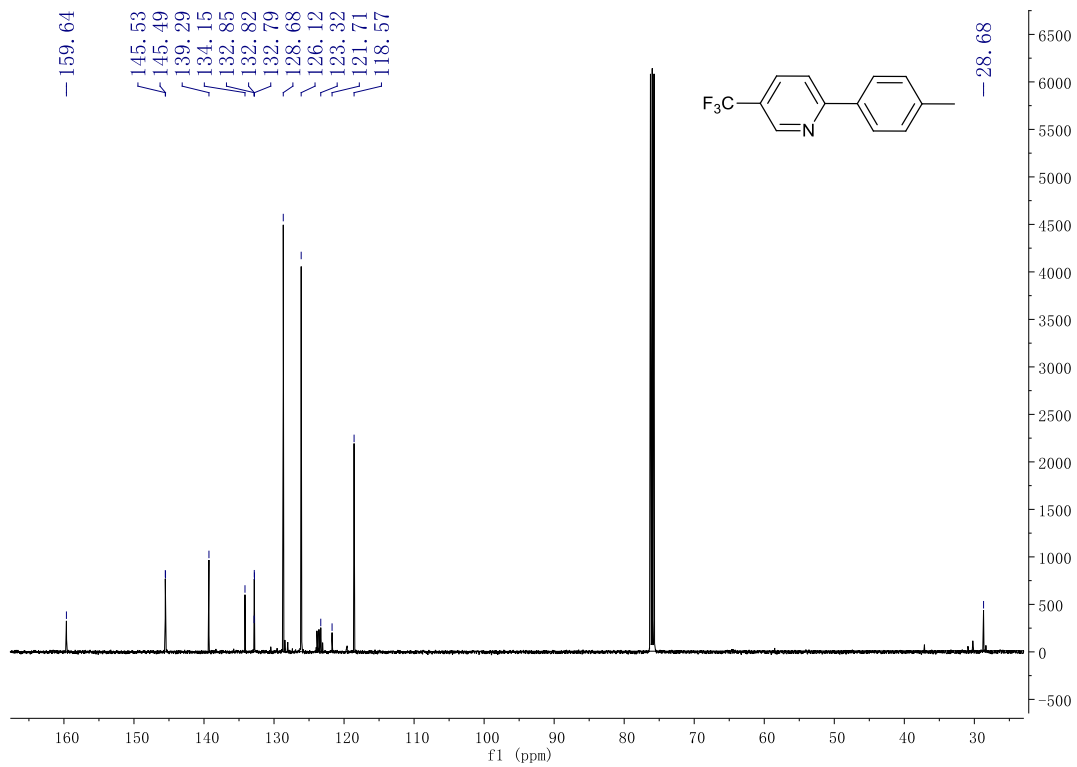

$^{13}\text{C}$  NMR of compound

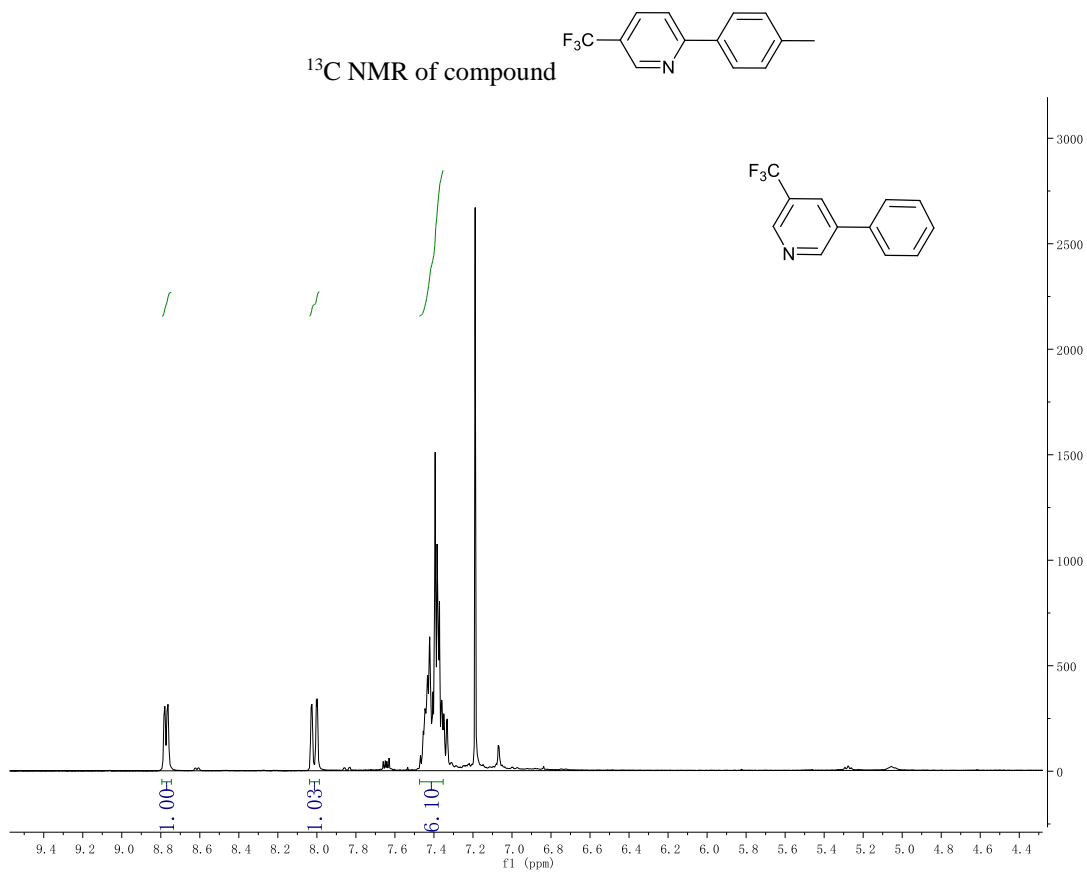

$^1\text{H}$  NMR of compound



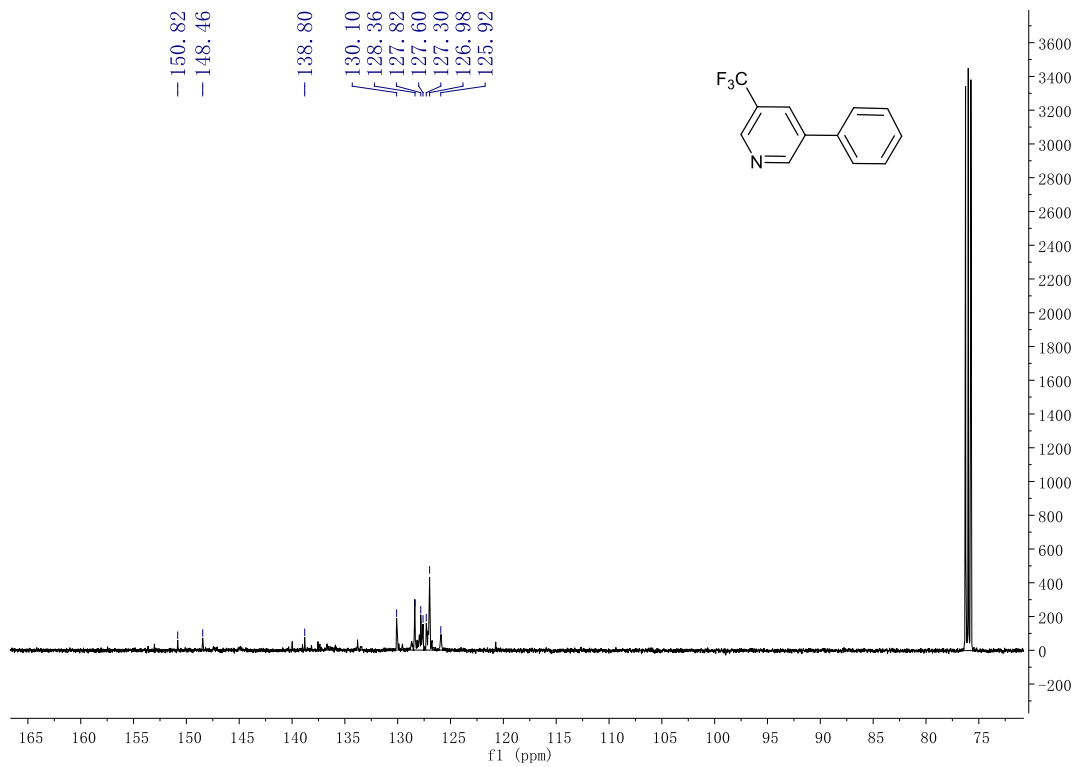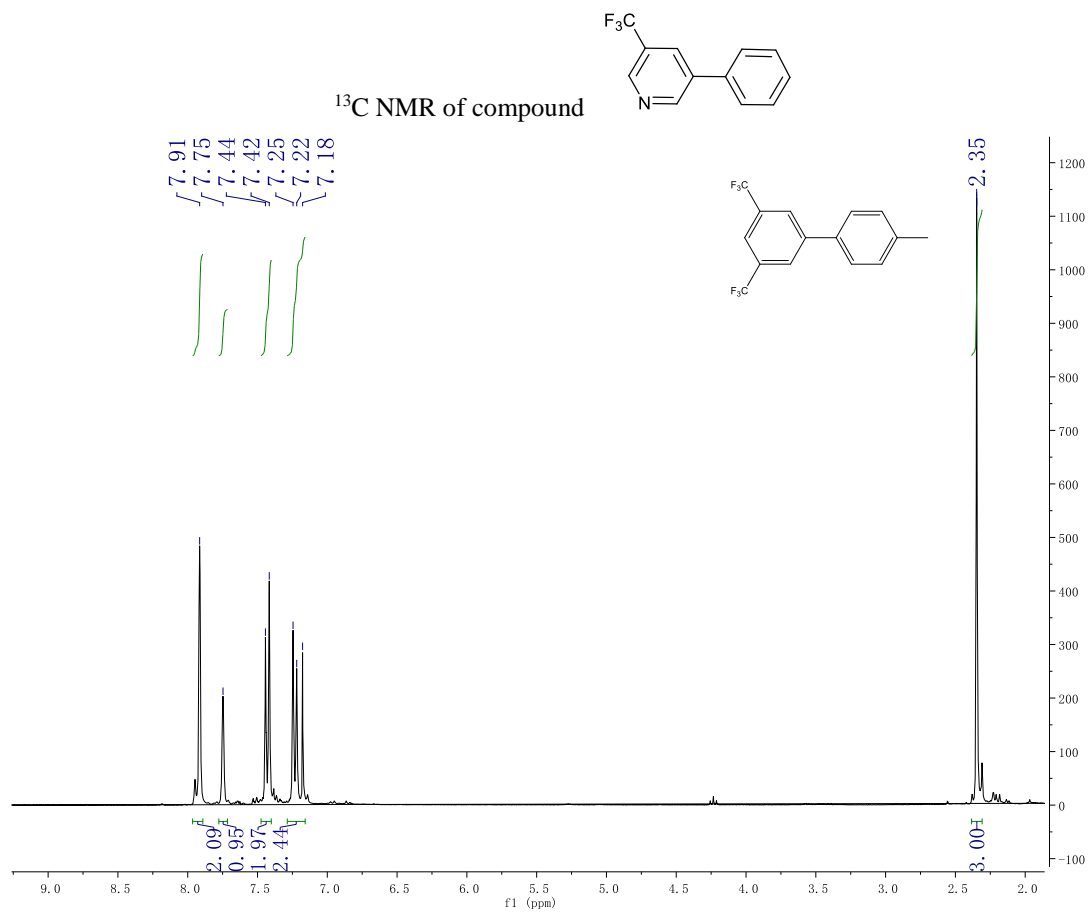

$^1\text{H}$  NMR of compound

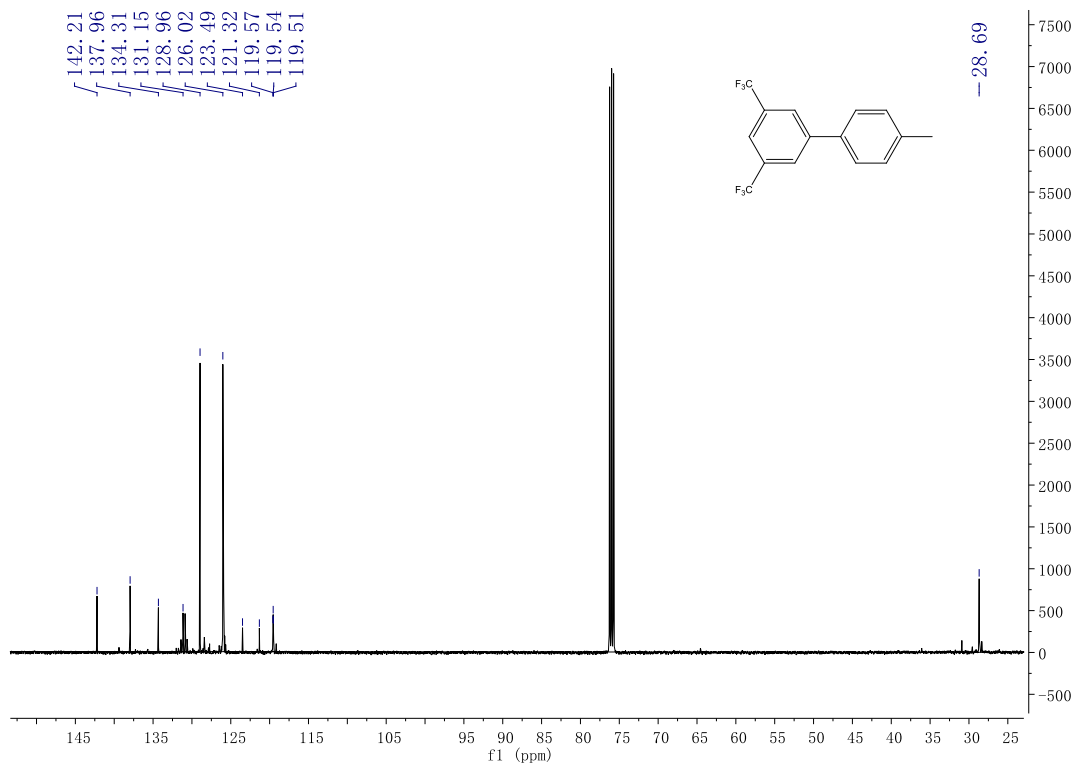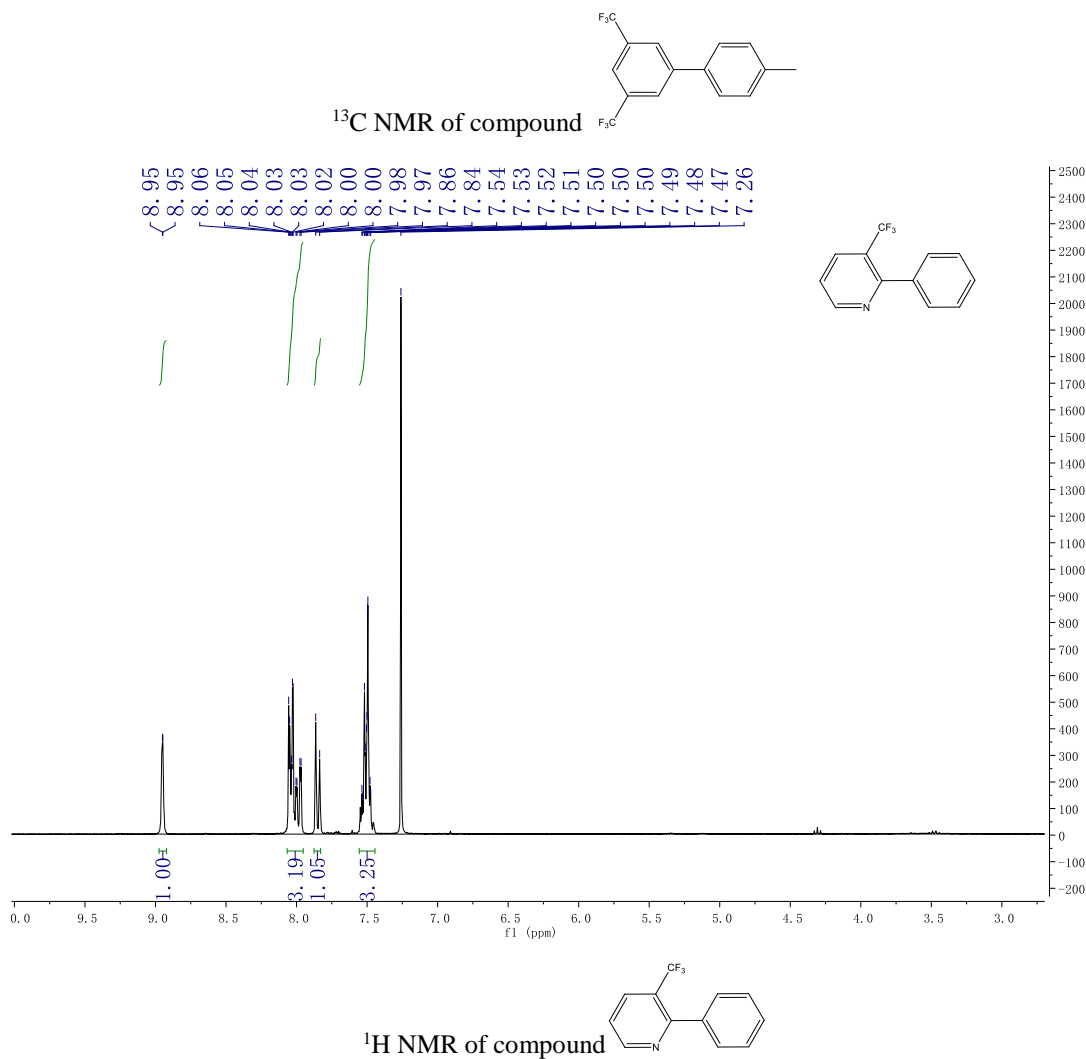

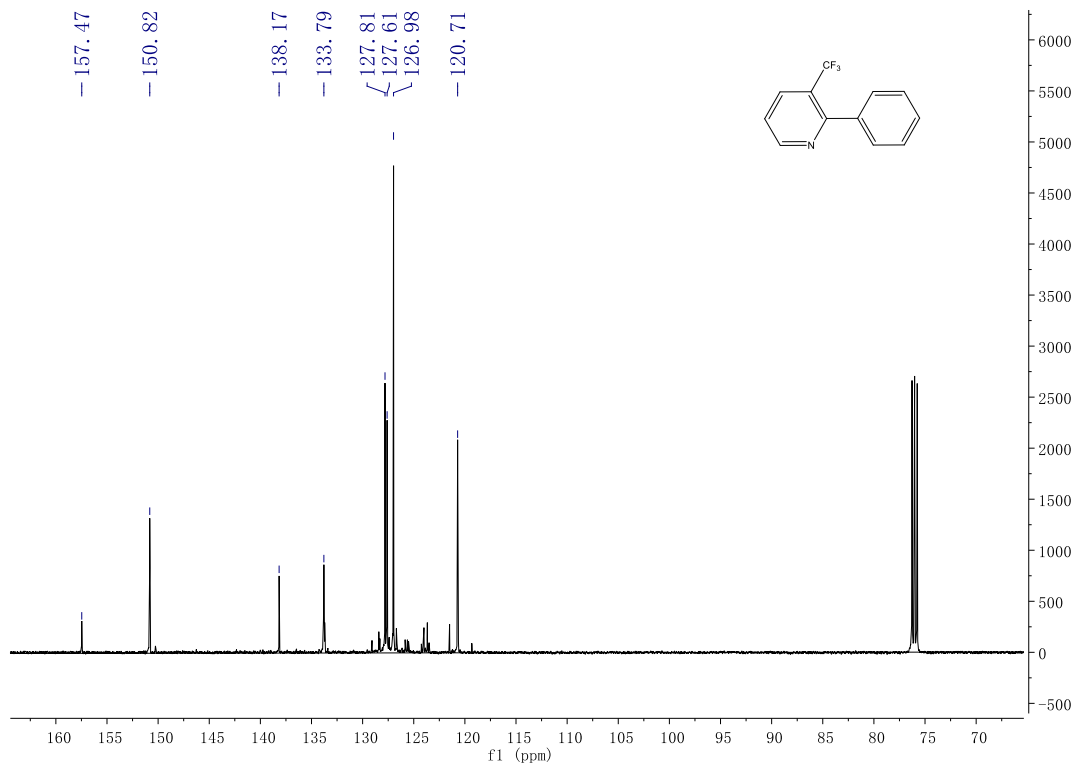

<sup>13</sup>C NMR of compound Cc1ccc(cc1)-c2ccccc2C(F)(F)F

### SIV MS of study on the catalytic reaction mechanism

| Sample Name   | 20170713-qxh1   | Position    | P1-F7  | Instrument Name | Instrument 1 | User Name              |                       |
|---------------|-----------------|-------------|--------|-----------------|--------------|------------------------|-----------------------|
| Inj Vol       | -1              | InjPosition |        | SampleType      | Sample       | IRM Calibration Status | Success               |
| Data Filename | 20170713-qxh1.d | ACQ Method  | 0103.m | Comment         |              | Acquired Time          | 7/13/2017 11:12:45 AM |

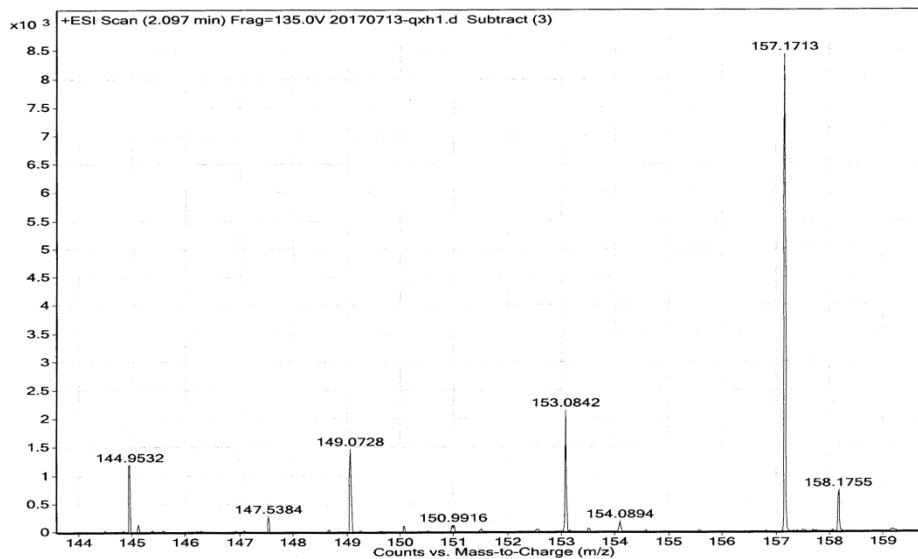

MS of biphenyl

|               |                |             |        |                 |              |                        |                     |
|---------------|----------------|-------------|--------|-----------------|--------------|------------------------|---------------------|
| Sample Name   | qxh-01         | Position    | P1-F2  | Instrument Name | Instrument 1 | User Name              |                     |
| Inj Vol       | -1             | InjPosition |        | SampleType      | Sample       | IRM Calibration Status | Success             |
| Data Filename | 170703qxh-01.d | ACQ Method  | 0103.m | Comment         |              | Acquired Time          | 7/3/2017 3:38:33 PM |

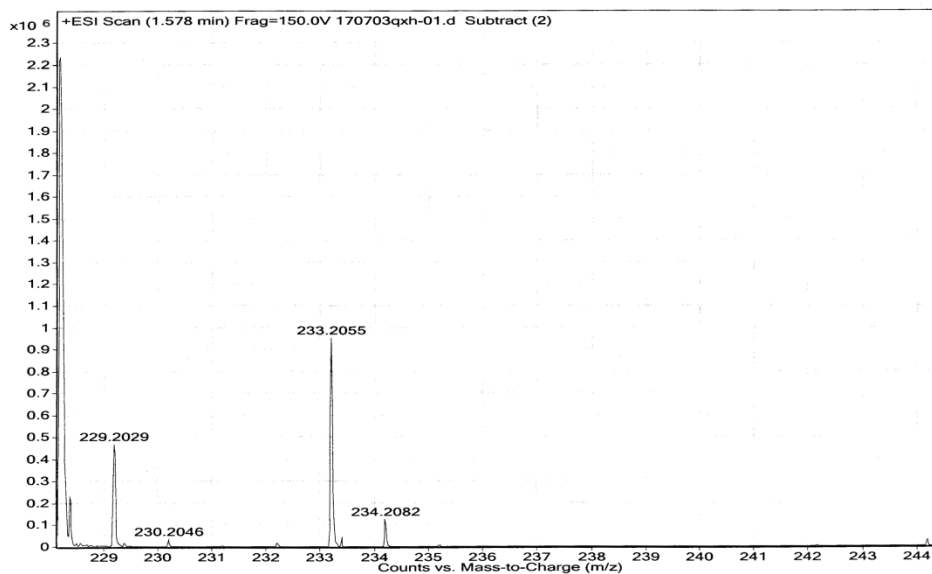

MS of the TEMPO capture product of phenyl radical

|               |                |             |        |                 |              |                        |                     |
|---------------|----------------|-------------|--------|-----------------|--------------|------------------------|---------------------|
| Sample Name   | qxh-01         | Position    | P1-F2  | Instrument Name | Instrument 1 | User Name              |                     |
| Inj Vol       | -1             | InjPosition |        | SampleType      | Sample       | IRM Calibration Status | Success             |
| Data Filename | 170703qxh-01.d | ACQ Method  | 0103.m | Comment         |              | Acquired Time          | 7/3/2017 3:38:33 PM |

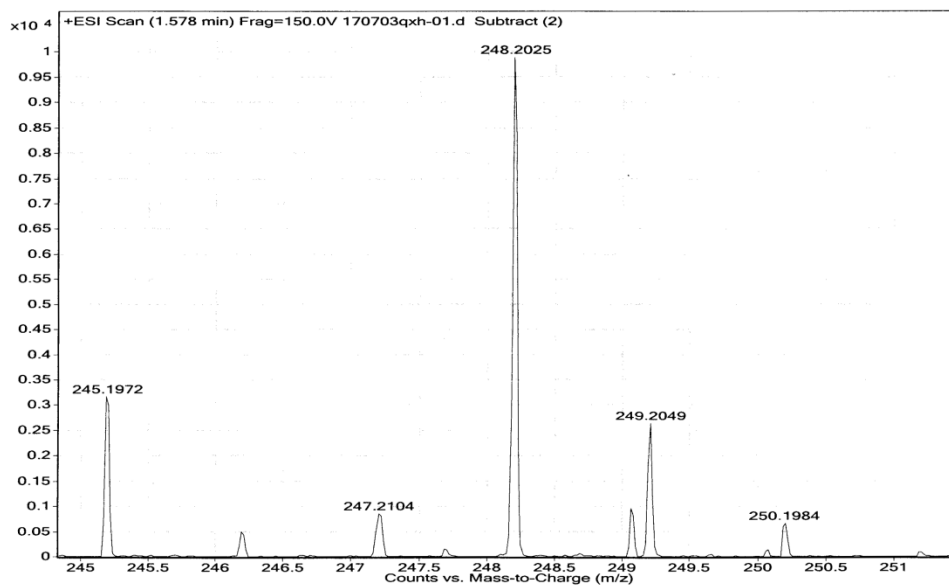

MS of the TEMPO capture product of 4-methyl-phenyl radical
